# Supplementary material for: RBM10 Is a Biomarker Associated with Pan‐Cancer Prognosis and Immune Infiltration: System Analysis Combined with In Vitro and Vivo Experiments
Source: Hindawi journal article supplement (doi:10.1155/2022/7654937), 2022-01-01

## HCC827 细胞 STR 鉴定报告

### 一、 材料处理和检验方法

取适量 **HCC827** 细胞(编号 XB0421-1811,  $1 \times 10^6$ )使用 Microread Genomic DNA Kit 提取 DNA, 采用 MicroreaderTM21 ID System 扩增 20 个 STR 位点和性别鉴定位点, 使用 ABI 3730xl 型遗传分析仪进行 PCR 产物检测, 使用 GeneMapperID-X 软件 (Applied Biosystems) 对检测结果进行分析, 并与 ATCC、DSMZ、JCRB、Cellosaurus 等数据库进行比对。

### 二、 检测结果

实验中阴性及阳性对照结果均正确。

**HCC827** (编号 XB0421-1811) 细胞株的 STR 位点和 Amelogenin 位点的基因分型结果见附表, 分型图谱见附图。

### 三、 分析说明

**HCC827** (编号 XB0421-1811) 细胞株基因组 DNA 扩增后图谱清晰, 分型结果良好。

### 四、 检验结论

1. **HCC827** (编号 XB0421-1811) 细胞株 DNA 进行细胞 STR 分型结果显示, 细胞株中未发现人类细胞交叉污染。
2. 该细胞株 DNA 分型在细胞库中找到与其细胞分型 100.00%相匹配的细胞株, 细胞株名称为 **HCC827**。

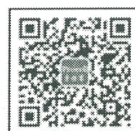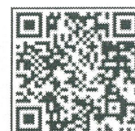

附表 1: 细胞株HCC827 的 STR 位点和 Amelogenin 位点的基因分型结果

| STR Loci                                                                                                                                             | 样品名称: XB0421-1811 | 数据库名称: HCC827 |
|------------------------------------------------------------------------------------------------------------------------------------------------------|-------------------|---------------|
| Amelogenin                                                                                                                                           | X,X               | X             |
| CSF1PO                                                                                                                                               | 11,11             | 11            |
| D2S1338                                                                                                                                              | 17,24             | 17,24         |
| D3S1358                                                                                                                                              | 17,17             | 17            |
| D5S818                                                                                                                                               | 12,12             | 12            |
| D7S820                                                                                                                                               | 11,12             | 11,12         |
| D8S1179                                                                                                                                              | 12,12             | 12            |
| D13S317                                                                                                                                              | 9,9               | 9             |
| D16S539                                                                                                                                              | 12,12             | 12            |
| D18S51                                                                                                                                               | 13,13             | 13            |
| D19S433                                                                                                                                              | 14,14             | 14            |
| D21S11                                                                                                                                               | 31,31             | 31            |
| FGA                                                                                                                                                  | 22,24             | 22,24         |
| PentaD                                                                                                                                               | 14,14             | 14            |
| PentaE                                                                                                                                               | 20,20             | 20            |
| TH01                                                                                                                                                 | 6,6               | 6             |
| TPOX                                                                                                                                                 | 8,8               | 8             |
| vWA                                                                                                                                                  | 18,18             | 18            |
| D1S1656                                                                                                                                              |                   |               |
| D6S1043                                                                                                                                              | 11,12             |               |
| D12S391                                                                                                                                              | 17,17             |               |
| D2S441                                                                                                                                               | 11,11.3           |               |
| Cellosaurus 数据库匹配度 100.00%, 匹配位点数 17 ( <a href="https://web.expasy.org/cellosaurus-str-search/">https://web.expasy.org/cellosaurus-str-search/</a> ) |                   |               |

## 备注:

1. 根据国际细胞鉴定委员会(ICLAC)制定的细胞 STR 鉴定标准,细胞系的匹配度 $\geq 80\%$  时,认为它们具有相关性,即衍生于共同的祖先细胞;匹配度在 55% 至 80% 之间,需要进一步验证相关性;小于 55%,表明两者不具有相关性。
2. 图谱有效峰为真实的 PCR 条带;小峰和非特异性条带在计算中忽略不计。
3. STR 数据比对结果默认 ExPASy, 数据来源包括 ATCC, DSMZ, JCRB 等细胞库以及文献和资料记载,数据库入口 <https://web.expasy.org/cellosaurus-str-search/>。



**武汉普诺赛生命科技有限公司**  
**Procell Life Science&Technology Co.,Ltd.**

**附图 1: HCC827 细胞 STR 位点和 Amelogenin 位点的基因分型结果**

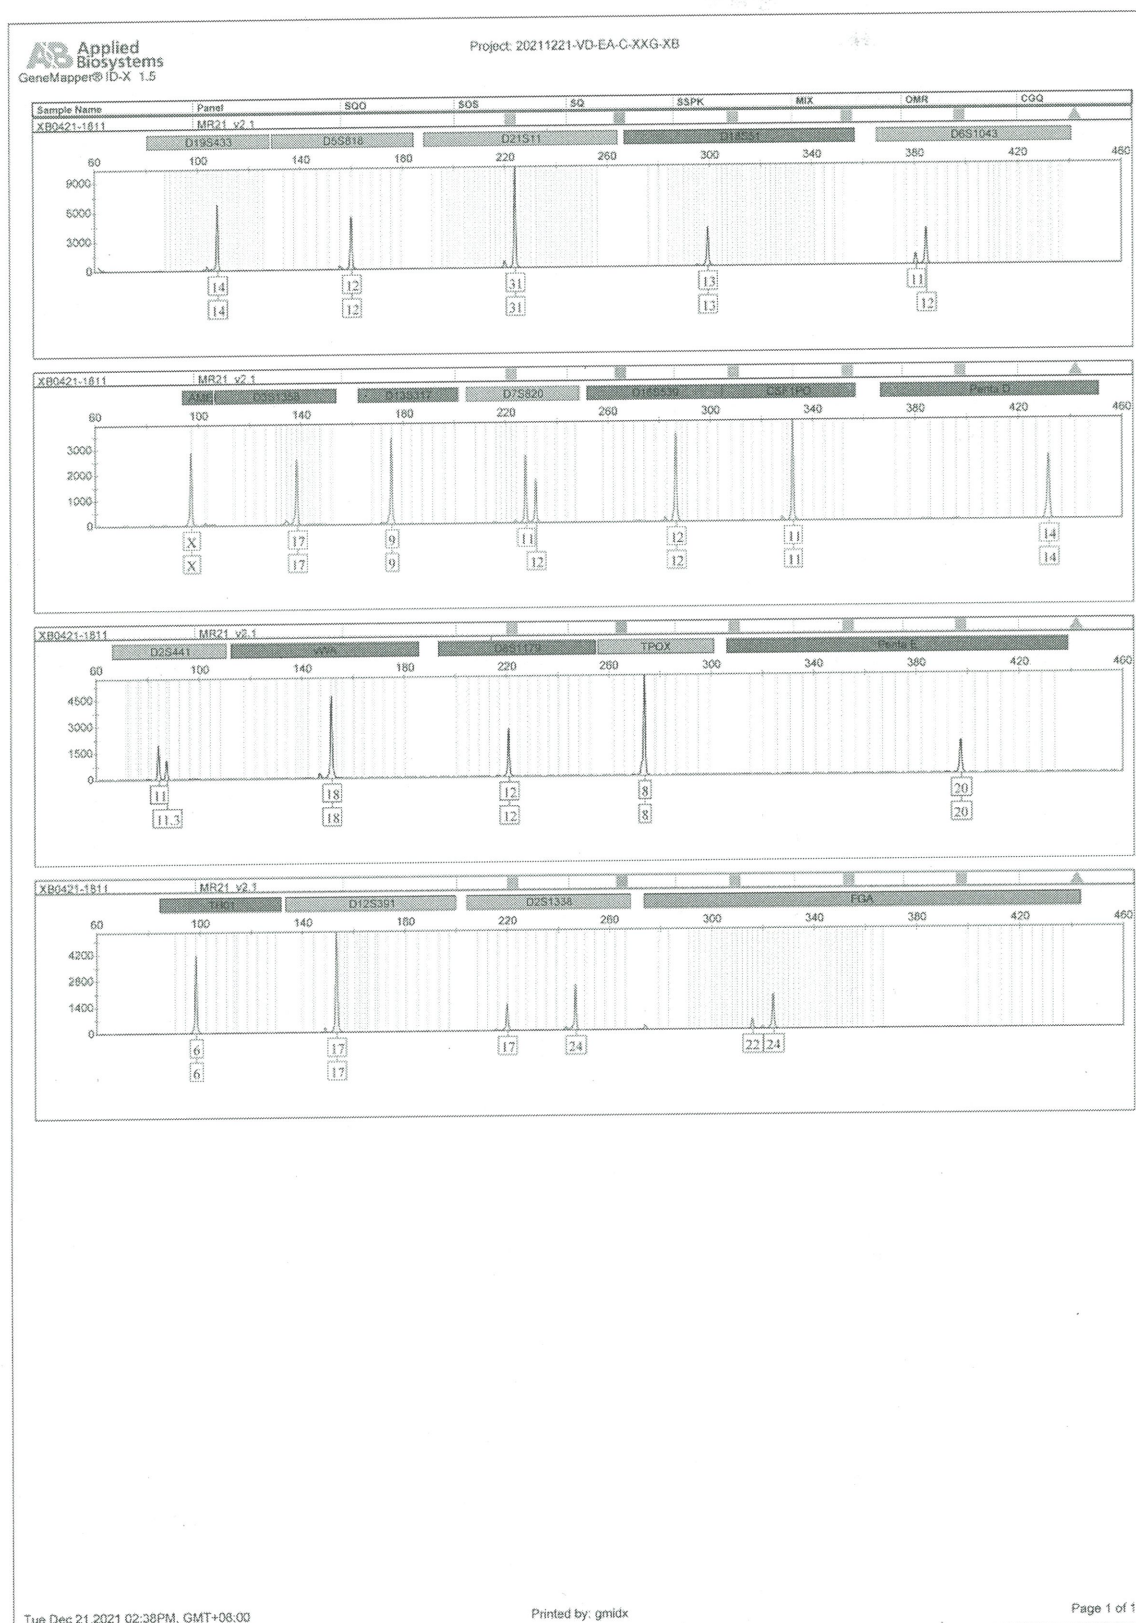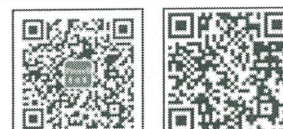

Supplement: f1 [file 7654937.f1.zip]
