# Supplementary material for: RBM10 Is a Biomarker Associated with Pan‐Cancer Prognosis and Immune Infiltration: System Analysis Combined with In Vitro and Vivo Experiments
Source: Hindawi journal article supplement (doi:10.1155/2022/7654937), 2022-01-01

## H3255 细胞 STR 检验报告

鉴定日期：2021 年 4 月 21 日

### 一、 检材：

H3255 细胞沉淀：

要求鉴定该株细胞是否为单一来源细胞系，是否存在交叉污染现象。

### 二、 检材处理和检验方法：

取适量检材用 Chelex100 提取 DNA，采用 Powerplex™16 ID System STR 复合扩增试剂盒进行扩增，在 ABI 3130xl 型遗传分析仪上对 STR 位点和性别基因 Amelogenin 进行检测。

### 三、 检验结果：

实验中阳性及阴性对照结果均正确。

该细胞株的 STR 位点和 Amelogenin 位点的基因分型结果见附表，分型图谱见附图。

### 四、 分析说明：

用 Gene Mapper v3.2 software(ABI)对各 STR 位点进行基因型分析。该细胞 DNA 扩增后图谱清晰，分型结果良好。

### 五、 检验结论：

①该株细胞 DNA 进行细胞 STR 分型结果显示，在各个基因座均未出现三等位基因现象，细胞中没有发现人类细胞交叉污染。

②该株细胞 STR 分型 ATCC、DSMZ 和 JCRB 细胞库中找到与其细胞分型 100%相匹配的细胞，细胞名称为 H3255 等。

#### Result of STR matching analysis by your data.

- DSMZ Profile Database -

A graphical presentation is shown at the bottom of this page.

| A graphical presentation is shown at the bottom of this page. |                   |           |             |         |        |         |        |      |      |       |        |         |
|---------------------------------------------------------------|-------------------|-----------|-------------|---------|--------|---------|--------|------|------|-------|--------|---------|
| EV                                                            | Cell No.          | Cell name | Locus names |         |        |         |        |      |      |       |        | Figures |
|                                                               |                   |           | D5S818      | D13S317 | D7S820 | D16S539 | VWA    | TH01 | AE   | TPOX  | CSF1PO |         |
|                                                               | Query (Your Cell) |           | 11, 12      | 11, 13  | 10, 13 | 8, 8    | 16, 16 | 6, 6 | x, x | 8, 11 | 11, 14 |         |
| 1.00 (36/36)                                                  | CEL-2882          | NCI-H3255 | 11, 12      | 11, 13  | 10, 13 | 8, 8    | 16, 16 | 6, 6 | x, x | 8, 11 | 11, 14 | -       |

附表：H3255 细胞的 STR 位点和 Amelogenin 位点的基因分型结果

| H3255 细胞 |          |          |
|----------|----------|----------|
| Marker   | Allele 1 | Allele 2 |
| D19S433  | 13       | 15       |
| D5S818   | 11       | 12       |
| D21S11   | 27       | 29       |
| D18S51   | 13       | 19       |
| AMEL     | X        | X        |
| D3S1358  | 16       | 17       |
| D13S317  | 11       | 13       |
| D7S820   | 10       | 13       |
| D16S539  | 8        | 8        |
| CSF1PO   | 11       | 14       |
| vWA      | 16       | 16       |
| D8S1179  | 13       | 14       |
| TPOX     | 8        | 11       |
| TH01     | 6        | 6        |
| D2S1338  | 19       | 21       |
| FGA      | 23       | 23       |

H3255 的分型图谱

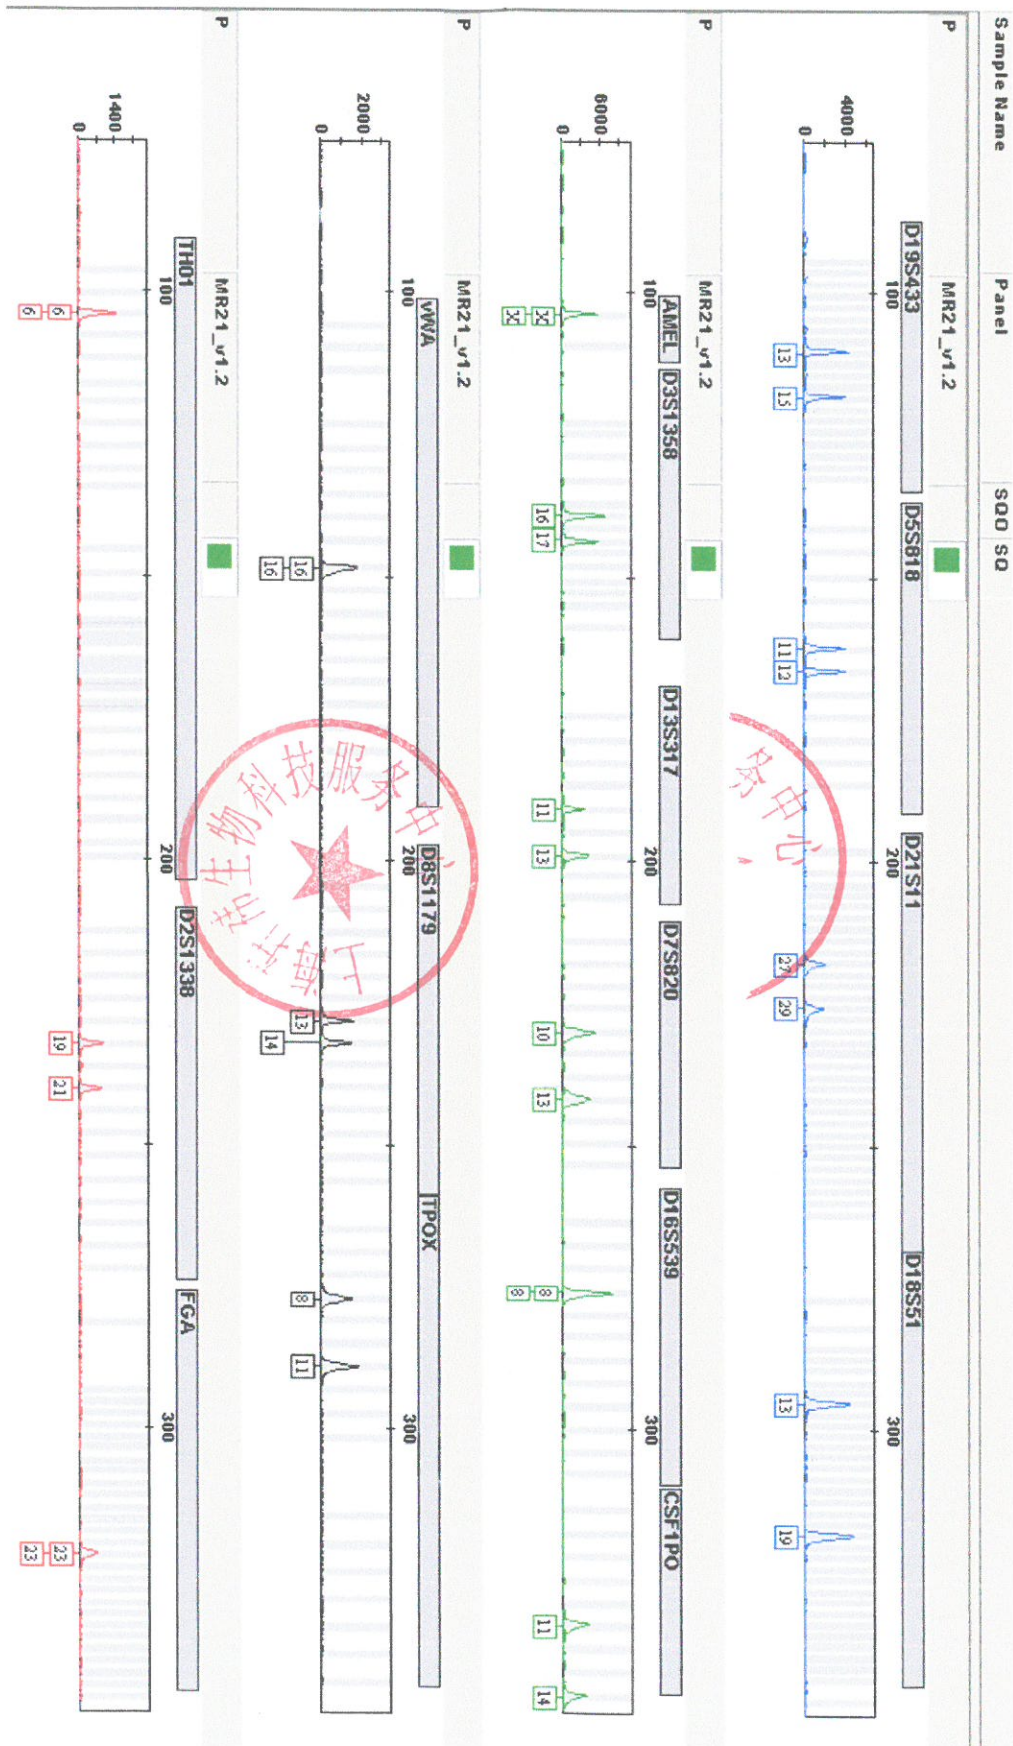

Supplement: f1 [file 7654937.f1.zip]
