# Supplementary material for: RBM10 Is a Biomarker Associated with Pan‐Cancer Prognosis and Immune Infiltration: System Analysis Combined with In Vitro and Vivo Experiments
Source: Hindawi journal article supplement (doi:10.1155/2022/7654937), 2022-01-01

## RBM10 Is a Biomarker Associated with Pan-Cancer Prognosis and Immune Infiltration: System analysis combined with *in vitro* and *vivo* experiments

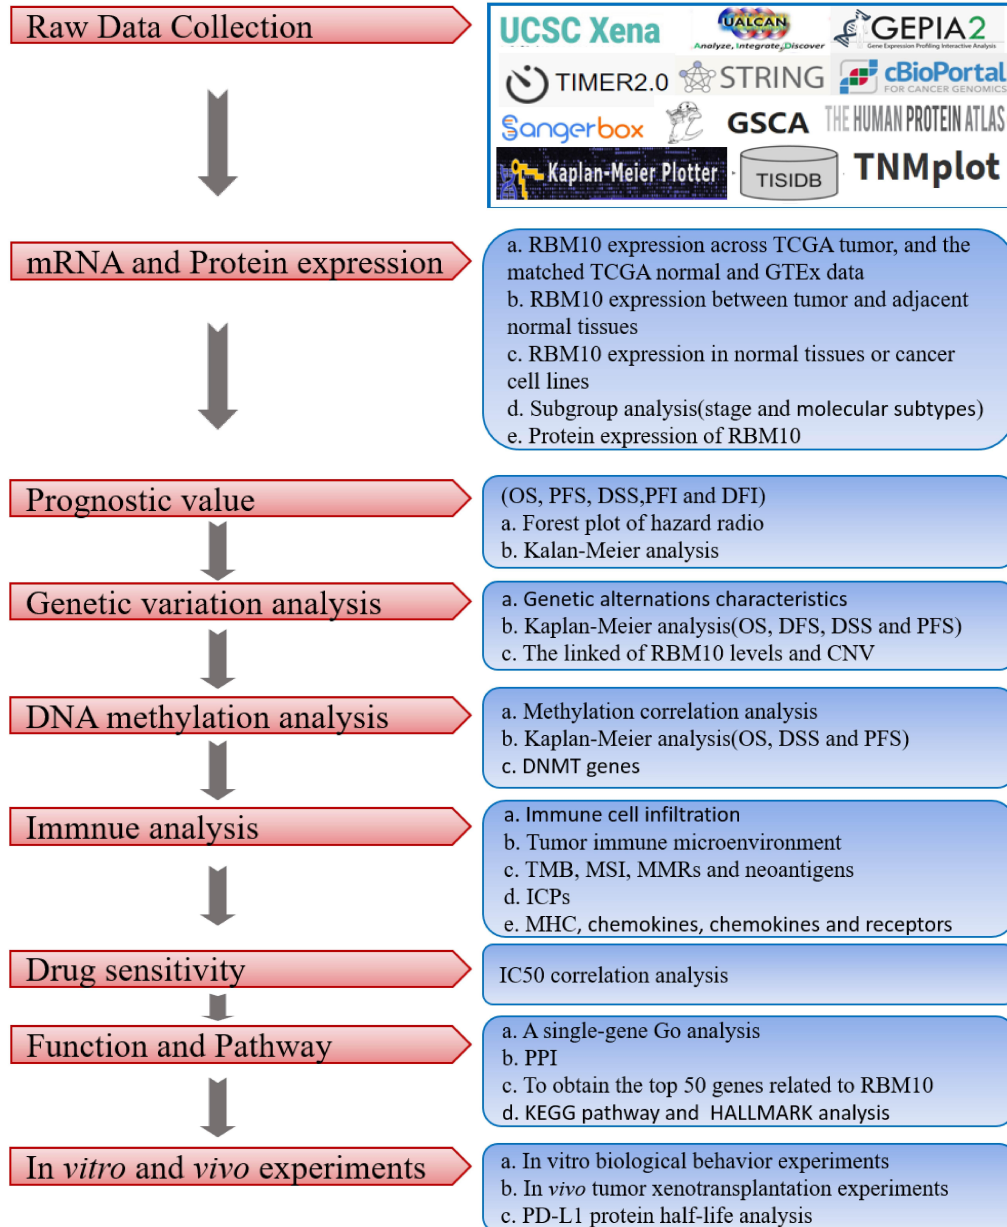

Supplement: f1 [file 7654937.f1.zip]
