# Supplementary material for: RBM10 Is a Biomarker Associated with Pan‐Cancer Prognosis and Immune Infiltration: System Analysis Combined with In Vitro and Vivo Experiments
Source: Hindawi journal article supplement (doi:10.1155/2022/7654937), 2022-01-01
Supplement: f1 [file 7654937.f1.zip]

## Tables S1~S8

**Table S1 List of abbreviations**

| <b>Abbreviations</b> | <b>Full names</b>                                                |
|----------------------|------------------------------------------------------------------|
| RBM10                | RNA binding motif protein 10                                     |
| ICP                  | immune checkpoint                                                |
| RBP                  | RNA binding motif protein                                        |
| LUAD                 | lung adenocarcinoma                                              |
| HCC                  | hepatocellular carcinoma                                         |
| TCGA                 | the Cancer Genome Atlas                                          |
| GTEX                 | the Genotype-Tissue Expression                                   |
| GEPIA2               | the Gene Expression Profiling Interactive Analysis2              |
| KM                   | Kaplan-Meier plotter                                             |
| CNV                  | copy number variations                                           |
| TIICs                | tumor-infiltrating immune cells                                  |
| TIMER                | the Tumor Immune Estimation Resource                             |
| TISIDB               | tumor-immune system interactions                                 |
| TMB                  | tumor mutation burden                                            |
| MSI                  | microsatellite instability                                       |
| GSEA                 | The Gene Set Enrichment Analysis                                 |
| HPA                  | Human Protein Atlas                                              |
| ACC                  | Adrenocortical carcinoma                                         |
| BLCA                 | Bladder Urothelial Carcinoma                                     |
| BRCA                 | Breast invasive carcinoma                                        |
| CESC                 | Cervical squamous cell carcinoma and endocervical adenocarcinoma |
| CHOL                 | Cholangio carcinoma                                              |
| COAD                 | Colon adenocarcinoma                                             |
| DLBC                 | Lymphoid Neoplasm Diffuse Large B-cell Lymphoma                  |
| ESCA                 | Esophageal carcinoma                                             |
| GBM                  | Glioblastoma multiforme                                          |
| HNSC                 | Head and Neck squamous cell carcinoma                            |
| KICH                 | Kidney Chromophobe                                               |
| KIRC                 | Kidney renal clear cell carcinoma                                |
| KIRP                 | Kidney renal papillary cell carcinoma                            |
| LAML                 | Acute Myeloid Leukemia                                           |
| LGG                  | Brain Lower Grade Glioma                                         |
| LIHC                 | Liver hepatocellular carcinoma                                   |
| LUSC                 | Lung squamous cell carcinoma                                     |
| MESO                 | Mesothelioma                                                     |
| OV                   | Ovarian serous cystadenocarcinoma                                |
| PAAD                 | Pancreatic adenocarcinoma                                        |
| PCPG                 | Pheochromocytoma and Paraganglioma                               |

|          |                                              |
|----------|----------------------------------------------|
| PRAD     | Prostate adenocarcinoma                      |
| READ     | Rectum adenocarcinoma                        |
| SARC     | Sarcoma                                      |
| SKCM     | Skin Cutaneous Melanoma                      |
| STAD     | Stomach adenocarcinoma                       |
| TGCT     | Testicular Germ Cell Tumors                  |
| THCA     | Thyroid carcinoma                            |
| THYM     | Thymoma                                      |
| UCEC     | Uterine Corpus Endometrial Carcinoma         |
| UCS      | Uterine Carcinosarcoma                       |
| UVM      | Uveal Melanoma                               |
| CPTAC    | Clinical Proteomic Tumor Analysis Consortium |
| OS       | overall survival                             |
| DFS      | disease-free survival                        |
| RFS      | relapse free survival                        |
| DFI      | disease free interval                        |
| PFI      | progress-free interval                       |
| DSS      | disease-specific survival                    |
| MHC      | major histocompatibility complex             |
| GDSC     | the Genomics of Drug Sensitivity in Cancer   |
| CTRP     | the Cancer Therapeutics Response Portal      |
| PPI      | the protein-protein interaction network      |
| KEGG     | the Kyoto Encyclopedia of Genes and Genomes  |
| FBS      | fetal bovine serum                           |
| CCK-8    | the Cell Counting Kit-8                      |
| WB       | Western blotting                             |
| RIPA     | radio-immunoprecipitation assay              |
| SDS-PAGE | sodium dodecyl sulfate-polyacrylamide gels   |
| PVDF     | polyvinylidene fluoride                      |
| RT       | room temperature                             |
| HRP      | horseradish peroxidase                       |
| ECL      | electrochemiluminescence                     |
| CHX      | cycloheximide                                |
| IHC      | Immunohistochemistry                         |
| CCLE     | the Cancer Cell Line Encyclopedia            |
| SCLC     | small cell lung cancer                       |
| GO       | Gene Ontology                                |
| HR       | Hazard Ratio                                 |
| DNMT     | DNA methyl-transferase                       |
| TIDE     | the Tumor Immune Dysfunction and Exclusion   |
| ICB      | immune checkpoint blockade                   |
| MMRs     | mismatch repairs                             |

**Table S2 A single- gene GO analysis of RBM10 by using SangerBox database.**

[illegible]

|            |                    |                                                                   |                |
|------------|--------------------|-------------------------------------------------------------------|----------------|
| GO:0005634 | cellular_component | nucleus                                                           | GO_REF:0000054 |
| GO:0006397 | biological_process | mRNA processing                                                   | GO_REF:0000037 |
| GO:0008150 | biological_process | biological_process                                                | GO_REF:0000015 |
| GO:0008285 | biological_process | negative regulation of<br>cell population<br>proliferation        | GO_REF:0000107 |
| GO:0008380 | biological_process | RNA splicing                                                      | GO_REF:0000037 |
| GO:0016607 | cellular_component | nuclear speck                                                     | GO_REF:0000052 |
| GO:0032991 | cellular_component | protein-containing<br>complex                                     | PMID:17707232  |
| GO:0034393 | biological_process | positive regulation of<br>smooth muscle cell<br>apoptotic process | GO_REF:0000107 |
| GO:0035198 | molecular_function | miRNA binding                                                     | PMID:28431233  |
| GO:0042802 | molecular_function | identical protein<br>binding                                      | PMID:22365833  |
| GO:0046872 | molecular_function | metal ion binding                                                 | GO_REF:0000037 |
| GO:0048025 | biological_process | negative regulation of<br>mRNA splicing, via<br>spliceosome       | GO_REF:0000107 |
| GO:0070935 | biological_process | 3'-UTR-mediated<br>mRNA stabilization                             | GO_REF:0000107 |

**Table S3 The correlation between RBM10 level and CNV via GSCA database.**

| <b>Cancer type</b> | <b>Symbol</b> | <b>Spm</b>   | <b>FDR</b>  |
|--------------------|---------------|--------------|-------------|
| ACC                | RBM10         | 0.312735027  | 0.013874786 |
| BLCA               | RBM10         | 0.224298337  | ≤0.001      |
| BRCA               | RBM10         | 0.032695301  | 0.321872128 |
| CESC               | RBM10         | 0.198174475  | 0.001288828 |
| CHOL               | RBM10         | -0.026649503 | 0.9305401   |
| COAD               | RBM10         | 0.049234885  | 0.504993157 |
| DLBC               | RBM10         | 0.060793573  | 0.873914456 |
| ESCA               | RBM10         | 0.354271778  | 2.36085E-06 |
| GBM                | RBM10         | -0.089842142 | 0.391369581 |
| HNSC               | RBM10         | 0.252786919  | 1.48826E-08 |
| KICH               | RBM10         | -0.105345568 | 0.553786178 |
| KIRC               | RBM10         | 0.047850676  | 0.360338073 |
| KIRP               | RBM10         | -0.207319066 | 0.001085239 |
| LAML               | RBM10         | -0.185320597 | 0.192709604 |
| LGG                | RBM10         | -0.161183684 | ≤0.001      |
| LIHC               | RBM10         | -0.023201043 | 0.726038703 |
| LUAD               | RBM10         | 0.124568482  | 0.007217392 |
| LUSC               | RBM10         | 0.141898069  | 0.002227904 |
| MESO               | RBM10         | -0.21891717  | 0.09015045  |
| OV                 | RBM10         | 0.252926363  | ≤0.001      |
| PAAD               | RBM10         | 0.057111568  | 0.548916797 |
| PCPG               | RBM10         | -0.097291225 | 0.353099366 |
| PRAD               | RBM10         | -0.137435242 | 0.006836241 |
| READ               | RBM10         | 0.015965979  | 0.921722263 |
| SARC               | RBM10         | 0.126481744  | 0.0648465   |
| SKCM               | RBM10         | 0.097503107  | 0.088977429 |
| STAD               | RBM10         | 0.202111167  | ≤0.001      |
| TGCT               | RBM10         | 0.025589368  | 0.817794155 |
| THCA               | RBM10         | -0.047419046 | 0.51155795  |
| THYM               | RBM10         | 0.232094649  | 0.050375431 |
| UCEC               | RBM10         | 0.121894394  | 0.160430524 |
| UCS                | RBM10         | 0.522719894  | ≤0.001      |
| UVM                | RBM10         | -0.074757811 | 0.698345119 |

**Table S4 The positively correlation of RBM10 mRNA level with the drug sensitivity in GDSC database.**

| Symbol | Drug               | Cor         | FDR         |
|--------|--------------------|-------------|-------------|
| RBM10  | Trametinib         | 0.33515606  | ≤0.001      |
| RBM10  | 17-AAG             | 0.306063151 | ≤0.001      |
| RBM10  | PD-0325901         | 0.279433628 | ≤0.001      |
| RBM10  | RDEA119            | 0.274006792 | ≤0.001      |
| RBM10  | Cetuximab          | 0.263296319 | 5.96728E-13 |
| RBM10  | Afatinib           | 0.25741971  | 2.36304E-14 |
| RBM10  | XAV939             | 0.252731385 | 1.34369E-12 |
| RBM10  | selumetinib        | 0.245232401 | 5.00115E-13 |
| RBM10  | Dasatinib          | 0.241804706 | ≤0.001      |
| RBM10  | Gefitinib          | 0.236330592 | 1.31081E-10 |
| RBM10  | Docetaxel          | 0.220374884 | 9.82831E-10 |
| RBM10  | WZ-1-84            | 0.217648188 | ≤0.001      |
| RBM10  | Erlotinib          | 0.210184033 | ≤0.001      |
| RBM10  | Lapatinib          | 0.208835612 | ≤0.001      |
| RBM10  | RO-3306            | 0.197411938 | 3.98458E-07 |
| RBM10  | WH-4-023           | 0.191011399 | 0.003437132 |
| RBM10  | Bleomycin (50 uM)  | 0.186339373 | 9.01569E-08 |
| RBM10  | CI-1040            | 0.183300545 | 1.83839E-06 |
| RBM10  | Bortezomib         | 0.179601091 | 0.005132911 |
| RBM10  | JNK Inhibitor VIII | 0.178807719 | 4.10172E-06 |
| RBM10  | FTI-277            | 0.174146862 | 5.80771E-06 |
| RBM10  | A-770041           | 0.161782232 | 0.016783069 |
| RBM10  | TGX221             | 0.159664743 | 0.007947479 |
| RBM10  | Saracatinib        | 0.156994822 | 0.034700752 |
| RBM10  | CCT007093          | 0.152379527 | ≤0.001      |
| RBM10  | BIRB 0796          | 0.138612216 | 0.002254472 |
| RBM10  | BMS-708163         | 0.136349469 | ≤0.001      |
| RBM10  | SGC0946            | 0.136016807 | 0.001808401 |
| RBM10  | CHIR-99021         | 0.132702314 | ≤0.001      |
| RBM10  | AKT inhibitor VIII | 0.131008191 | 0.001384013 |
| RBM10  | AS601245           | 0.123783561 | 0.005327948 |
| RBM10  | Bicalutamide       | 0.121114867 | 0.002760143 |
| RBM10  | IOX2               | 0.120329005 | 0.015182815 |
| RBM10  | GSK1904529A        | 0.11830902  | 0.00470482  |
| RBM10  | AMG-706            | 0.114182645 | 0.018204197 |
| RBM10  | SB 216763          | 0.107107733 | 0.020348243 |
| RBM10  | KIN001-055         | 0.102351939 | 0.033782392 |
| RBM10  | CCT018159          | 0.097476158 | 0.031330674 |
| RBM10  | Bryostatin 1       | 0.094015486 | 0.042317895 |

|       |             |             |             |
|-------|-------------|-------------|-------------|
| RBM10 | Bosutinib   | 0.093712751 | 0.038725332 |
| RBM10 | Midostaurin | 0.092705232 | 0.026049326 |
| RBM10 | FH535       | 0.087742701 | 0.043458613 |

**Table S5 The negatively correlation of RBM10 mRNA level with the drug sensitivity in GDSC database.**

| Symbol | Drug               | Cor          | FDR         |
|--------|--------------------|--------------|-------------|
| RBM10  | GSK1070916         | -0.344712733 | 7.36473E-25 |
| RBM10  | NPK76-II-72-1      | -0.337091794 | 9.45467E-25 |
| RBM10  | Navitoclax         | -0.336103607 | 1.61576E-22 |
| RBM10  | BX-912             | -0.331763642 | 8.75494E-24 |
| RBM10  | I-BET-762          | -0.303893649 | 5.0189E-20  |
| RBM10  | XMD13-2            | -0.297463995 | 6.5427E-19  |
| RBM10  | FK866              | -0.296088392 | 2.47342E-18 |
| RBM10  | Vorinostat         | -0.290087681 | 9.17831E-17 |
| RBM10  | CAY10603           | -0.285490994 | 2.55043E-17 |
| RBM10  | Methotrexate       | -0.282383795 | 6.20385E-16 |
| RBM10  | QL-X-138           | -0.281210373 | 1.4861E-16  |
| RBM10  | OSI-027            | -0.280209071 | 1.47216E-16 |
| RBM10  | AR-42              | -0.277800489 | 2.41113E-16 |
| RBM10  | WZ3105             | -0.276915172 | 1.89577E-16 |
| RBM10  | PHA-793887         | -0.268822296 | 1.04965E-15 |
| RBM10  | JW-7-24-1          | -0.266064818 | 3.39388E-15 |
| RBM10  | THZ-2-102-1        | -0.26519536  | 8.65848E-15 |
| RBM10  | PIK-93             | -0.260565433 | 9.524E-15   |
| RBM10  | Belinostat         | -0.255916819 | 1.87499E-13 |
| RBM10  | TPCA-1             | -0.253191791 | 5.94239E-14 |
| RBM10  | Tubastatin A       | -0.252651839 | 9.39869E-14 |
| RBM10  | TG101348           | -0.251599906 | 1.07623E-13 |
| RBM10  | PI-103             | -0.250628076 | 2.30724E-13 |
| RBM10  | CUDC-101           | -0.249149815 | 5.42212E-13 |
| RBM10  | CX-5461            | -0.247871695 | 5.49682E-13 |
| RBM10  | Genentech Cpd 10   | -0.245053377 | 8.61057E-13 |
| RBM10  | Ispinesib Mesylate | -0.239361959 | 3.11728E-12 |
| RBM10  | CP466722           | -0.234305451 | 5.81896E-12 |
| RBM10  | GSK690693          | -0.234041205 | 1.09655E-11 |
| RBM10  | UNC0638            | -0.233057749 | 2.6846E-12  |
| RBM10  | QL-XI-92           | -0.231629714 | 1.3291E-11  |
| RBM10  | XMD14-99           | -0.224407185 | 1.50429E-10 |
| RBM10  | KIN001-102         | -0.223387976 | 5.63454E-11 |
| RBM10  | BMS345541          | -0.214083454 | 4.40317E-10 |
| RBM10  | SNX-2112           | -0.203704803 | 3.90692E-09 |
| RBM10  | YM201636           | -0.203277935 | 4.84727E-09 |
| RBM10  | AT-7519            | -0.201803988 | 4.19909E-09 |
| RBM10  | TL-2-105           | -0.20149619  | 8.55356E-09 |
| RBM10  | ZSTK474            | -0.200623756 | 7.15436E-09 |



|       |                |              |             |
|-------|----------------|--------------|-------------|
| RBM10 | MPS-1-IN-1     | -0.198994196 | 1.79848E-08 |
| RBM10 | GSK2126458     | -0.194039405 | 3.36032E-08 |
| RBM10 | 5-Fluorouracil | -0.192420208 | 3.4378E-08  |
| RBM10 | ZM-447439      | -0.190060264 | 1.82776E-06 |
| RBM10 | NG-25          | -0.18667764  | 6.32807E-08 |
| RBM10 | KIN001-244     | -0.184837045 | 1.3456E-07  |
| RBM10 | KIN001-236     | -0.184245559 | 1.48117E-07 |
| RBM10 | IPA-3          | -0.181339553 | 7.86957E-07 |
| RBM10 | BIX02189       | -0.17842721  | 3.18934E-07 |
| RBM10 | Camptothecin   | -0.176984588 | 4.35103E-06 |
| RBM10 | Masitinib      | -0.174889218 | 8.01886E-07 |
| RBM10 | KIN001-260     | -0.172071954 | 8.24409E-07 |
| RBM10 | NSC-207895     | -0.17060809  | ≤0.001      |
| RBM10 | ZG-10          | -0.170072073 | 0.002589098 |
| RBM10 | Y-39983        | -0.169743246 | 1.61277E-06 |
| RBM10 | QL-XII-61      | -0.169484628 | 0.002625051 |
| RBM10 | LAQ824         | -0.168274414 | 5.19998E-06 |
| RBM10 | Foretinib      | -0.167839054 | 4.39983E-06 |
| RBM10 | TL-1-85        | -0.165750789 | 1.92185E-06 |
| RBM10 | Phenformin     | -0.165540938 | 3.44799E-06 |
| RBM10 | TAK-715        | -0.165265148 | 2.34512E-06 |
| RBM10 | BHG712         | -0.162053032 | 3.44253E-06 |
| RBM10 | CAL-101        | -0.157737233 | 9.6871E-06  |
| RBM10 | PAC-1          | -0.155276986 | ≤0.001      |
| RBM10 | QL-XII-47      | -0.153929893 | ≤0.001      |
| RBM10 | MP470          | -0.151782304 | ≤0.001      |
| RBM10 | CEP-701        | -0.136966718 | ≤0.001      |
| RBM10 | Etoposide      | -0.136631218 | ≤0.001      |
| RBM10 | KIN001-270     | -0.132749325 | ≤0.001      |
| RBM10 | HG-5-113-01    | -0.132728979 | 0.031197657 |
| RBM10 | GSK429286A     | -0.131806199 | ≤0.001      |
| RBM10 | Mitomycin C    | -0.130953269 | 0.002427446 |
| RBM10 | AICAR          | -0.124072947 | 0.001149139 |
| RBM10 | THZ-2-49       | -0.121993792 | ≤0.001      |
| RBM10 | T0901317       | -0.121791425 | 0.001384339 |
| RBM10 | SB52334        | -0.120857742 | 0.002339877 |
| RBM10 | AZD8055        | -0.117604438 | 0.002101619 |
| RBM10 | OSI-930        | -0.11722396  | 0.001552765 |
| RBM10 | XMD15-27       | -0.116164313 | 0.004603447 |
| RBM10 | BX-795         | -0.112905157 | 0.005790896 |
| RBM10 | SN-38          | -0.111566031 | 0.004463161 |
| RBM10 | JQ1            | -0.110989336 | 0.004811212 |
| RBM10 | AC220          | -0.105490957 | 0.010918245 |

|       |             |              |             |
|-------|-------------|--------------|-------------|
| RBM10 | BAY 61-3606 | -0.103813266 | 0.008027306 |
| RBM10 | STF-62247   | -0.102252772 | 0.008199532 |
| RBM10 | VNLG/124    | -0.101046528 | 0.009167674 |
| RBM10 | JQ12        | -0.097750267 | 0.041441842 |
| RBM10 | KIN001-266  | -0.093921093 | 0.031237833 |
| RBM10 | Shikonin    | -0.09242589  | 0.04747328  |
| RBM10 | AP-24534    | -0.086272292 | 0.029863094 |
| RBM10 | AS605240    | -0.084675871 | 0.036011557 |
| RBM10 | EKB-569     | -0.078372205 | 0.045065163 |

**Table S6 A significant difference about the relationship of RBM10 level with drug sensitivity in CTRP was observed.**

| Symbol | Drug                     | Cor          | FDR         |
|--------|--------------------------|--------------|-------------|
| RBM10  | abiraterone              | 0.285420004  | 0.017837743 |
| RBM10  | PD 153035                | 0.189418715  | ≤0.001      |
| RBM10  | vandetanib               | 0.186683857  | ≤0.001      |
| RBM10  | VAF-347                  | 0.17680274   | 0.002006369 |
| RBM10  | saracatinib              | 0.171559745  | ≤0.001      |
| RBM10  | erlotinib                | 0.158523871  | ≤0.001      |
| RBM10  | dasatinib                | 0.150351927  | ≤0.001      |
| RBM10  | trametinib               | 0.129452006  | 0.061372738 |
| RBM10  | selumetinib              | 0.116119246  | 0.008651008 |
| RBM10  | BRD-K17060750            | 0.102129039  | 0.0305061   |
| RBM10  | PD318088                 | 0.100382852  | 0.022569762 |
| RBM10  | BRD-K30748066            | -0.513441379 | 0.001271158 |
| RBM10  | GSK-J4                   | -0.483463905 | ≤0.001      |
| RBM10  | LY-2183240               | -0.450286687 | 8.04206E-38 |
| RBM10  | GSK461364                | -0.437857673 | 5.95352E-35 |
| RBM10  | triazolothiadiazine      | -0.436519594 | 3.10951E-36 |
| RBM10  | teniposide               | -0.425984318 | 1.52736E-17 |
| RBM10  | vincristine              | -0.423797526 | 9.45121E-35 |
| RBM10  | tivantinib               | -0.410386994 | 4.33722E-15 |
| RBM10  | PX-12                    | -0.408744086 | 3.3888E-30  |
| RBM10  | parbendazole             | -0.407247393 | 2.98448E-31 |
| RBM10  | necrosulfonamide         | -0.404423256 | 1.98945E-20 |
| RBM10  | cytarabine hydrochloride | -0.401463128 | 8.81933E-30 |
| RBM10  | BI-2536                  | -0.401256456 | 1.78278E-30 |
| RBM10  | KX2-391                  | -0.400193887 | 6.75602E-29 |
| RBM10  | docetaxel                | -0.398946733 | 3.25738E-13 |
| RBM10  | KPT185                   | -0.398186823 | 2.08689E-21 |
| RBM10  | ceranib-2                | -0.395778275 | 3.60092E-29 |
| RBM10  | YK 4-279                 | -0.395355178 | 9.28117E-29 |
| RBM10  | SB-743921                | -0.393153998 | 4.55764E-29 |
| RBM10  | clofarabine              | -0.391772396 | 1.84653E-28 |
| RBM10  | BRD-K70511574            | -0.390927692 | 1.13426E-27 |
| RBM10  | doxorubicin              | -0.387820176 | 2.75049E-28 |
| RBM10  | SB-225002                | -0.387385821 | 4.02774E-28 |
| RBM10  | etoposide                | -0.384946019 | 4.48766E-27 |
| RBM10  | narciclasine             | -0.384584198 | 3.18426E-26 |
| RBM10  | PL-DI                    | -0.384240301 | 2.01232E-26 |
| RBM10  | KW-2449                  | -0.382980983 | 1.08885E-26 |
| RBM10  | topotecan                | -0.382222276 | 3.50253E-27 |

|       |                |              |             |
|-------|----------------|--------------|-------------|
| RBM10 | axitinib       | -0.381966004 | 3.42982E-26 |
| RBM10 | chlorambucil   | -0.379913819 | 3.11633E-25 |
| RBM10 | BRD-K34222889  | -0.376669565 | 8.15682E-26 |
| RBM10 | FQI-2          | -0.376492174 | 2.99724E-26 |
| RBM10 | CD-437         | -0.375168015 | 2.23772E-25 |
| RBM10 | piperlongumine | -0.375132712 | 8.44603E-26 |
| RBM10 | rigosertib     | -0.372645252 | 2.80545E-24 |
| RBM10 | isoevodiamine  | -0.37032306  | 5.79063E-25 |
| RBM10 | belinostat     | -0.369186311 | 1.40907E-12 |
| RBM10 | PRIMA-1        | -0.366057546 | 6.02965E-23 |
| RBM10 | dinaciclib     | -0.364971507 | 6.23222E-12 |
| RBM10 | CHM-1          | -0.364061247 | 3.4535E-24  |
| RBM10 | nakiterpiosin  | -0.362949457 | 1.07795E-23 |
| RBM10 | gemcitabine    | -0.3620733   | 7.53814E-22 |
| RBM10 | tipifarnib-P2  | -0.359743865 | 1.95078E-12 |
| RBM10 | ciclopirox     | -0.358418769 | 9.42243E-24 |
| RBM10 | mitomycin      | -0.355566639 | 9.71172E-23 |
| RBM10 | paclitaxel     | -0.353448935 | 3.28394E-22 |
| RBM10 | tozasertib     | -0.349054881 | 0.020994242 |
| RBM10 | manumycin A    | -0.347679258 | 7.30502E-22 |
| RBM10 | SN-38          | -0.346632998 | 1.96218E-17 |
| RBM10 | FQI-1          | -0.343372229 | 3.06967E-11 |
| RBM10 | barasertib     | -0.343052012 | 1.04131E-20 |
| RBM10 | ML311          | -0.342093784 | 1.00076E-21 |
| RBM10 | LRRK2-IN-1     | -0.341973003 | 2.60531E-15 |
| RBM10 | BRD-K66453893  | -0.341339488 | 4.79131E-21 |
| RBM10 | vorinostat     | -0.340223451 | 8.57979E-21 |
| RBM10 | ELCPK          | -0.338472274 | 8.63203E-10 |
| RBM10 | ISOX           | -0.337925438 | 1.48205E-20 |
| RBM10 | alvocidib      | -0.336829432 | 6.79855E-10 |
| RBM10 | BRD-A94377914  | -0.336219274 | 9.06996E-11 |
| RBM10 | GW-843682X     | -0.335265522 | 1.43166E-18 |
| RBM10 | NSC95397       | -0.333876438 | 6.3853E-18  |
| RBM10 | panobinostat   | -0.333542346 | 1.38741E-20 |
| RBM10 | PHA-793887     | -0.333526479 | 1.88641E-20 |
| RBM10 | BRD-K26531177  | -0.332514607 | 5.65873E-18 |
| RBM10 | PF-3758309     | -0.332384123 | 4.26992E-10 |
| RBM10 | PF-184         | -0.332219802 | 3.95127E-19 |
| RBM10 | alisertib      | -0.331194243 | 1.599E-19   |
| RBM10 | decitabine     | -0.328200622 | 6.73862E-20 |
| RBM10 | NVP-231        | -0.327983985 | 3.61587E-19 |
| RBM10 | apicidin       | -0.325990532 | 1.14731E-19 |
| RBM10 | cerulenin      | -0.325244545 | 8.05857E-19 |

|       |                           |              |             |
|-------|---------------------------|--------------|-------------|
| RBM10 | leptomycin B              | -0.324816289 | 7.49139E-20 |
| RBM10 | pifithrin-mu              | -0.324567221 | 3.98809E-18 |
| RBM10 | BRD-K61166597             | -0.321695796 | 2.3529E-17  |
| RBM10 | Merck60                   | -0.319335766 | 1.28636E-18 |
| RBM10 | indisulam                 | -0.318997072 | 1.70568E-17 |
| RBM10 | NSC48300                  | -0.318248238 | 4.36609E-18 |
| RBM10 | SNX-2112                  | -0.315631721 | 1.92492E-18 |
| RBM10 | COL-3                     | -0.314638114 | 4.40915E-13 |
| RBM10 | 3-Cl-AHPC                 | -0.312700871 | 1.46468E-17 |
| RBM10 | methylstat                | -0.312348393 | 2.87011E-12 |
| RBM10 | AT13387                   | -0.309962501 | 2.51089E-08 |
| RBM10 | omacetaxine mepesuccinate | -0.30887033  | 1.06729E-12 |
| RBM10 | entinostat                | -0.305818118 | 1.0661E-16  |
| RBM10 | PAC-1                     | -0.303889374 | 7.85386E-16 |
| RBM10 | SCH-79797                 | -0.302278016 | 2.25888E-16 |
| RBM10 | CR-1-31B                  | -0.302060106 | 5.25158E-17 |
| RBM10 | obatoclax                 | -0.301938317 | 2.20954E-16 |
| RBM10 | SR-II-138A                | -0.299131453 | 5.53339E-17 |
| RBM10 | olaparib                  | -0.298319296 | 1.52545E-15 |
| RBM10 | NSC632839                 | -0.297870754 | 4.351E-16   |
| RBM10 | pevonedistat              | -0.297210946 | 3.46295E-15 |
| RBM10 | QW-BI-011                 | -0.294900775 | ≤0.001      |
| RBM10 | BRD-K35604418             | -0.291924685 | 1.00956E-14 |
| RBM10 | MK-1775                   | -0.291400999 | 4.5294E-15  |
| RBM10 | CCT036477                 | -0.288878097 | 5.43291E-15 |
| RBM10 | ouabain                   | -0.288411067 | 3.22087E-15 |
| RBM10 | STF-31                    | -0.288371665 | 2.76796E-14 |
| RBM10 | crizotinib                | -0.288336462 | 7.41356E-15 |
| RBM10 | BRD-A86708339             | -0.286435916 | 3.73768E-07 |
| RBM10 | curcumin                  | -0.285343899 | 1.13827E-14 |
| RBM10 | CIL70                     | -0.280908519 | 1.38458E-07 |
| RBM10 | MST-312                   | -0.279778685 | 5.68497E-14 |
| RBM10 | tacedinaline              | -0.279236599 | 2.42023E-10 |
| RBM10 | daporinad                 | -0.278572295 | 1.15531E-11 |
| RBM10 | AT7867                    | -0.277306481 | 3.01214E-13 |
| RBM10 | BRD-K48334597             | -0.277235427 | 0.008332378 |
| RBM10 | BIX-01294                 | -0.275404379 | 1.31292E-13 |
| RBM10 | Compound 7d-cis           | -0.271734793 | 2.32907E-11 |
| RBM10 | OSI-930                   | -0.271723885 | 6.03553E-11 |
| RBM10 | cucurbitacin I            | -0.269611852 | 1.67553E-12 |
| RBM10 | brivanib                  | -0.268267382 | 6.59125E-12 |
| RBM10 | NSC19630                  | -0.268094586 | 3.09915E-09 |
| RBM10 | WP1130                    | -0.26791358  | 2.33808E-12 |

|       |                    |              |             |
|-------|--------------------|--------------|-------------|
| RBM10 | BRD-K66532283      | -0.267414706 | 3.34916E-12 |
| RBM10 | SU11274            | -0.267314584 | 3.94186E-12 |
| RBM10 | CIL56              | -0.266735035 | 2.46471E-06 |
| RBM10 | bardoxolone methyl | -0.266630417 | 2.6752E-11  |
| RBM10 | PF-573228          | -0.266091331 | 1.2171E-12  |
| RBM10 | BMS-345541         | -0.266045403 | 1.93892E-12 |
| RBM10 | tipifarnib-P1      | -0.265246792 | 2.5896E-12  |
| RBM10 | sotrastaurin       | -0.264683287 | 2.80753E-09 |
| RBM10 | serdemetan         | -0.264383114 | 6.29661E-12 |
| RBM10 | CAY10618           | -0.26228606  | 1.67419E-12 |
| RBM10 | JQ-1               | -0.261850279 | 7.83219E-13 |
| RBM10 | BRD1812            | -0.260395957 | 7.40139E-12 |
| RBM10 | bortezomib         | -0.259941063 | 6.98184E-12 |
| RBM10 | marinopyrrole A    | -0.259893    | 6.43998E-08 |
| RBM10 | bendamustine       | -0.259535559 | 1.9815E-10  |
| RBM10 | I-BET151           | -0.25832579  | 1.25764E-12 |
| RBM10 | pazopanib          | -0.258166025 | 8.42967E-12 |
| RBM10 | neopeltolide       | -0.258110906 | 0.002525838 |
| RBM10 | AZ-3146            | -0.258017171 | 3.41577E-11 |
| RBM10 | GMX-1778           | -0.257387086 | 1.53269E-11 |
| RBM10 | MGCD-265           | -0.252596225 | 1.70019E-11 |
| RBM10 | PRIMA-1-Met        | -0.247722152 | ≤0.001      |
| RBM10 | MLN2238            | -0.245113553 | 8.11478E-11 |
| RBM10 | ML031              | -0.244951448 | 2.6498E-09  |
| RBM10 | GSK525762A         | -0.244733649 | 2.68704E-11 |
| RBM10 | AZD7762            | -0.243554936 | 4.18992E-11 |
| RBM10 | avrainvillamide    | -0.243259273 | 9.09848E-08 |
| RBM10 | isoliquiritigenin  | -0.241687324 | 0.003057436 |
| RBM10 | B02                | -0.241525661 | 3.93334E-10 |
| RBM10 | BRD-K28456706      | -0.240328891 | 8.95008E-10 |
| RBM10 | darinaparsin       | -0.240110008 | ≤0.001      |
| RBM10 | gossypol           | -0.238493729 | 6.90589E-10 |
| RBM10 | Ki8751             | -0.237101023 | 3.22544E-09 |
| RBM10 | HLI 373            | -0.233899659 | 2.05165E-09 |
| RBM10 | BRD-K80183349      | -0.233615784 | 6.68949E-10 |
| RBM10 | ML210              | -0.232263537 | 1.74634E-09 |
| RBM10 | dacarbazine        | -0.231863407 | 7.11994E-10 |
| RBM10 | SMER-3             | -0.231611403 | 3.72341E-08 |
| RBM10 | methotrexate       | -0.23095746  | 5.44643E-09 |
| RBM10 | phlorethin         | -0.230903782 | 1.00379E-09 |
| RBM10 | nutlin-3           | -0.23076353  | 1.70757E-09 |
| RBM10 | tubastatin A       | -0.230585959 | ≤0.001      |
| RBM10 | GW-405833          | -0.228923161 | 8.90285E-10 |

|       |                                      |              |             |
|-------|--------------------------------------|--------------|-------------|
| RBM10 | foretinib                            | -0.228779544 | 5.52119E-09 |
| RBM10 | neuronal differentiation inducer III | -0.227926212 | 1.01459E-09 |
| RBM10 | ABT-199                              | -0.227826035 | ≤0.001      |
| RBM10 | KU-60019                             | -0.226909498 | 1.78829E-09 |
| RBM10 | erastin                              | -0.226124573 | 1.01264E-08 |
| RBM10 | N9-isopropylolomoucine               | -0.224245369 | 9.88423E-09 |
| RBM10 | fingolimod                           | -0.223928991 | 4.07912E-09 |
| RBM10 | RITA                                 | -0.223926164 | 1.03219E-08 |
| RBM10 | ABT-737                              | -0.222894389 | 5.13174E-08 |
| RBM10 | fluorouracil                         | -0.222486395 | 3.12529E-09 |
| RBM10 | BRD-K92856060                        | -0.220885597 | 1.81988E-08 |
| RBM10 | tigecycline                          | -0.220875754 | ≤0.001      |
| RBM10 | SID 26681509                         | -0.218701374 | 1.66889E-07 |
| RBM10 | TW-37                                | -0.218179345 | 2.05963E-08 |
| RBM10 | valdecoxib                           | -0.217971845 | 1.89028E-08 |
| RBM10 | Compound 23 citrate                  | -0.217835445 | 1.08958E-08 |
| RBM10 | PI-103                               | -0.21751912  | 2.21578E-08 |
| RBM10 | ETP-46464                            | -0.217413385 | 8.44618E-06 |
| RBM10 | BRD-K51490254                        | -0.21728438  | 8.98492E-08 |
| RBM10 | triptolide                           | -0.217239288 | 1.01312E-08 |
| RBM10 | Ko-143                               | -0.216846141 | 1.59632E-08 |
| RBM10 | R428                                 | -0.216670003 | 4.24824E-06 |
| RBM10 | BRD-K88742110                        | -0.216457227 | 4.1331E-08  |
| RBM10 | NSC23766                             | -0.2164278   | 2.19548E-08 |
| RBM10 | MG-132                               | -0.215747903 | 0.00321574  |
| RBM10 | oligomycin A                         | -0.215201502 | 2.24696E-08 |
| RBM10 | SNS-032                              | -0.213528086 | 7.24432E-08 |
| RBM10 | NVP-BSK805                           | -0.213088027 | 2.11475E-08 |
| RBM10 | tacrolimus                           | -0.212770129 | 1.06652E-07 |
| RBM10 | navitoclax                           | -0.21197321  | 6.98347E-08 |
| RBM10 | TPCA-1                               | -0.210695213 | 2.15403E-08 |
| RBM10 | CIL55A                               | -0.20925687  | ≤0.001      |
| RBM10 | momelotinib                          | -0.209061603 | 9.77404E-08 |
| RBM10 | linifanib                            | -0.208134075 | 2.85123E-08 |
| RBM10 | BRD-K11533227                        | -0.208090372 | 4.79496E-07 |
| RBM10 | zebularine                           | -0.207309535 | 6.23669E-08 |
| RBM10 | epigallocatechin-3-monogallate       | -0.206710744 | 7.67404E-07 |
| RBM10 | sunitinib                            | -0.206323257 | 7.56591E-08 |
| RBM10 | SKI-II                               | -0.206027627 | 4.97793E-07 |
| RBM10 | sirolimus                            | -0.204872343 | 7.35889E-08 |
| RBM10 | elocalcitol                          | -0.202374641 | 1.05012E-07 |
| RBM10 | SRT-1720                             | -0.201482806 | 1.21043E-06 |

|       |                     |              |             |
|-------|---------------------|--------------|-------------|
| RBM10 | KU 0060648          | -0.201480536 | 1.79739E-07 |
| RBM10 | tretinoin           | -0.200274642 | 2.95593E-07 |
| RBM10 | NVP-BEZ235          | -0.199090635 | ≤0.001      |
| RBM10 | 1S,3R-RSL-3         | -0.198950741 | 1.91096E-07 |
| RBM10 | ML239               | -0.198703972 | 3.95918E-07 |
| RBM10 | AZD8055             | -0.197684011 | 3.52128E-07 |
| RBM10 | Mdivi-1             | -0.197309816 | 6.9085E-07  |
| RBM10 | Bax channel blocker | -0.197245956 | 1.94768E-06 |
| RBM10 | TG-101348           | -0.197028886 | 2.94976E-07 |
| RBM10 | purmorphamine       | -0.196857221 | ≤0.001      |
| RBM10 | BRD6340             | -0.194083665 | 5.44074E-07 |
| RBM10 | AZD1480             | -0.19253934  | 0.002673439 |
| RBM10 | AA-COCF3            | -0.191548857 | 2.1863E-06  |
| RBM10 | CHIR-99021          | -0.191427717 | 1.57319E-06 |
| RBM10 | Compound 1541A      | -0.189644137 | ≤0.001      |
| RBM10 | BRD-K29313308       | -0.188202814 | 2.95133E-06 |
| RBM10 | skepinone-L         | -0.187252105 | 0.001723457 |
| RBM10 | BRD-K45681478       | -0.185826651 | 7.73346E-06 |
| RBM10 | BRD-K13999467       | -0.185756109 | 4.00926E-06 |
| RBM10 | KU-0063794          | -0.18476311  | 3.06954E-06 |
| RBM10 | tosedostat          | -0.184021267 | 5.02735E-06 |
| RBM10 | AZD4547             | -0.183778212 | ≤0.001      |
| RBM10 | temsirolimus        | -0.182980778 | 0.001554108 |
| RBM10 | brefeldin A         | -0.182244707 | ≤0.001      |
| RBM10 | Repligen 136        | -0.178906543 | ≤0.001      |
| RBM10 | UNC0638             | -0.178761994 | 7.92213E-06 |
| RBM10 | RG-108              | -0.176611471 | ≤0.001      |
| RBM10 | BRD-K24690302       | -0.175894761 | ≤0.001      |
| RBM10 | niclosamide         | -0.175747864 | ≤0.001      |
| RBM10 | GSK-3 inhibitor IX  | -0.175716111 | ≤0.001      |
| RBM10 | sorafenib           | -0.175442933 | ≤0.001      |
| RBM10 | ML162               | -0.175355593 | 7.66196E-06 |
| RBM10 | PIK-93              | -0.174163402 | ≤0.001      |
| RBM10 | BIRB-796            | -0.173542576 | ≤0.001      |
| RBM10 | Ch-55               | -0.172383711 | ≤0.001      |
| RBM10 | BMS-754807          | -0.171748465 | ≤0.001      |
| RBM10 | AM-580              | -0.171640682 | ≤0.001      |
| RBM10 | masitinib           | -0.170639389 | ≤0.001      |
| RBM10 | YM-155              | -0.169232312 | ≤0.001      |
| RBM10 | BRD-K55116708       | -0.169048857 | ≤0.001      |
| RBM10 | cabozantinib        | -0.168048046 | ≤0.001      |
| RBM10 | BIBR-1532           | -0.167538879 | ≤0.001      |
| RBM10 | BRD-K41597374       | -0.167397665 | ≤0.001      |



|       |                           |              |             |
|-------|---------------------------|--------------|-------------|
| RBM10 | NSC 74859                 | -0.16708525  | ≤0.001      |
| RBM10 | ML050                     | -0.166146753 | ≤0.001      |
| RBM10 | StemRegenin 1             | -0.165654168 | ≤0.001      |
| RBM10 | nintedanib                | -0.164863553 | ≤0.001      |
| RBM10 | ruxolitinib               | -0.164669487 | ≤0.001      |
| RBM10 | KU-55933                  | -0.16450581  | ≤0.001      |
| RBM10 | vorapaxar                 | -0.163857426 | ≤0.001      |
| RBM10 | HBX-41108                 | -0.163651878 | 0.001230782 |
| RBM10 | lenvatinib                | -0.162800029 | ≤0.001      |
| RBM10 | imatinib                  | -0.162210409 | ≤0.001      |
| RBM10 | BRD1835                   | -0.161762452 | ≤0.001      |
| RBM10 | CD-1530                   | -0.159600309 | 0.001293039 |
| RBM10 | OSI-027                   | -0.159055505 | ≤0.001      |
| RBM10 | ML320                     | -0.157593522 | ≤0.001      |
| RBM10 | 16-beta-bromoandrosterone | -0.157474617 | ≤0.001      |
| RBM10 | tandutinib                | -0.156935049 | ≤0.001      |
| RBM10 | BRD-K63431240             | -0.155260196 | ≤0.001      |
| RBM10 | CIL41                     | -0.155094341 | 0.016264129 |
| RBM10 | KHS101                    | -0.154848542 | ≤0.001      |
| RBM10 | dexamethasone             | -0.154786091 | ≤0.001      |
| RBM10 | BRD-A02303741             | -0.154778486 | 0.00160666  |
| RBM10 | BRD-K97651142             | -0.153649699 | ≤0.001      |
| RBM10 | PDMP                      | -0.153390551 | ≤0.001      |
| RBM10 | BRD-A71883111             | -0.152119933 | ≤0.001      |
| RBM10 | BMS-270394                | -0.150767315 | ≤0.001      |
| RBM10 | MK-2206                   | -0.145088122 | ≤0.001      |
| RBM10 | tivozanib                 | -0.143574464 | 0.001107668 |
| RBM10 | LE-135                    | -0.143285588 | ≤0.001      |
| RBM10 | SCH-529074                | -0.143136335 | 0.001076522 |
| RBM10 | DBeQ                      | -0.142643608 | ≤0.001      |
| RBM10 | prochlorperazine          | -0.142388718 | ≤0.001      |
| RBM10 | dabrafenib                | -0.141939509 | 0.038402495 |
| RBM10 | regorafenib               | -0.138054715 | 0.002741171 |
| RBM10 | AZD7545                   | -0.137551939 | ≤0.001      |
| RBM10 | BMS-195614                | -0.135324597 | 0.01463656  |
| RBM10 | MI-2                      | -0.134245229 | 0.038203064 |
| RBM10 | PF-750                    | -0.130413345 | 0.003586307 |
| RBM10 | linsitinib                | -0.129658684 | 0.001687375 |
| RBM10 | bexarotene                | -0.12121199  | 0.003877024 |
| RBM10 | quizartinib               | -0.119726534 | 0.022786462 |
| RBM10 | azacitidine               | -0.119715477 | 0.009355954 |
| RBM10 | necrostatin-1             | -0.118310785 | 0.007779996 |
| RBM10 | parthenolide              | -0.117040546 | 0.022956726 |

|       |                 |              |             |
|-------|-----------------|--------------|-------------|
| RBM10 | GDC-0941        | -0.114518624 | 0.007278228 |
| RBM10 | NVP-TAE684      | -0.110082204 | 0.012340032 |
| RBM10 | fluvastatin     | -0.109922019 | 0.019473151 |
| RBM10 | ML029           | -0.109147621 | 0.010751584 |
| RBM10 | NVP-ADW742      | -0.1091076   | 0.010296305 |
| RBM10 | necrostatin-7   | -0.10777509  | 0.012860534 |
| RBM10 | GSK4112         | -0.106935185 | 0.019130139 |
| RBM10 | pyrazolanthrone | -0.10662658  | 0.018601588 |
| RBM10 | RAF265          | -0.106535118 | 0.037516088 |
| RBM10 | BRD-K02251932   | -0.105994519 | 0.025816927 |
| RBM10 | XL765           | -0.103692614 | 0.042665256 |
| RBM10 | ML203           | -0.102944103 | 0.040475716 |
| RBM10 | VER-155008      | -0.10113511  | 0.014178719 |
| RBM10 | spautin-1       | -0.099405965 | 0.033935819 |
| RBM10 | TG-100-115      | -0.095478086 | 0.045094582 |
| RBM10 | BRD-K85133207   | -0.09528713  | 0.027044231 |
| RBM10 | cytochalasin B  | -0.094100992 | 0.049057695 |
| RBM10 | pandacostat     | -0.092589108 | 0.041944338 |

**Table S7 Top 50 RBM10 related genes were explored using GEPIA2.**

| Gene Symbol | Gene ID            | PCC  |
|-------------|--------------------|------|
| UBTF        | ENSG00000108312.14 | 0.63 |
| SAFB        | ENSG00000160633.12 | 0.61 |

|          |                    |      |
|----------|--------------------|------|
| DHX30    | ENSG00000132153.14 | 0.6  |
| HNRNPA0  | ENSG00000177733.6  | 0.58 |
| SUGP1    | ENSG00000105705.15 | 0.58 |
| MLLT1    | ENSG00000130382.8  | 0.57 |
| ILF3     | ENSG00000129351.17 | 0.56 |
| HDGFRP2  | ENSG00000167674.14 | 0.56 |
| SRRT     | ENSG00000087087.18 | 0.56 |
| CCDC22   | ENSG00000101997.12 | 0.55 |
| HCFC1    | ENSG00000172534.13 | 0.55 |
| U2AF2    | ENSG00000063244.12 | 0.55 |
| NELFB    | ENSG00000188986.4  | 0.55 |
| UBA1     | ENSG00000130985.16 | 0.54 |
| BRF1     | ENSG00000185024.15 | 0.54 |
| SNRNP70  | ENSG00000104852.14 | 0.54 |
| OTUD5    | ENSG00000068308.13 | 0.54 |
| ZNF777   | ENSG00000196453.7  | 0.54 |
| DDX39B   | ENSG00000198563.13 | 0.54 |
| FUS      | ENSG00000089280.18 | 0.54 |
| CHTOP    | ENSG00000160679.12 | 0.54 |
| GRIPAP1  | ENSG00000068400.13 | 0.53 |
| NCOA5    | ENSG00000124160.11 | 0.53 |
| RANBP3   | ENSG00000031823.14 | 0.53 |
| GPKOW    | ENSG00000068394.10 | 0.53 |
| EHMT2    | ENSG00000204371.11 | 0.53 |
| EWSR1    | ENSG00000182944.17 | 0.53 |
| SF3B2    | ENSG00000087365.14 | 0.53 |
| CACTIN   | ENSG00000105298.13 | 0.53 |
| DHX9     | ENSG00000135829.16 | 0.53 |
| HNRNPM   | ENSG00000099783.11 | 0.53 |
| NRF1     | ENSG00000106459.14 | 0.53 |
| TAF6L    | ENSG00000162227.7  | 0.53 |
| MED22    | ENSG00000148297.15 | 0.52 |
| USP11    | ENSG00000102226.9  | 0.52 |
| SNAPC4   | ENSG00000165684.3  | 0.52 |
| AAAS     | ENSG00000094914.12 | 0.52 |
| GTF2F1   | ENSG00000125651.13 | 0.51 |
| COPS7B   | ENSG00000144524.17 | 0.51 |
| SNRNP200 | ENSG00000144028.14 | 0.51 |
| DPF2     | ENSG00000133884.9  | 0.51 |
| SGTA     | ENSG00000104969.9  | 0.51 |
| CPSF3L   | ENSG00000127054.18 | 0.51 |
| SFSWAP   | ENSG00000061936.9  | 0.51 |
| SART3    | ENSG00000075856.11 | 0.51 |

|          |                    |      |
|----------|--------------------|------|
| PELP1    | ENSG00000141456.14 | 0.51 |
| ALKBH4   | ENSG00000160993.3  | 0.51 |
| C19orf68 | ENSG00000185453.12 | 0.51 |
| CCAR2    | ENSG00000158941.16 | 0.51 |
| NONO     | ENSG00000147140.15 | 0.5  |

**Table S8 The detail enrichment results of KEGG pathway and HALLMARK of RBM10 in GSEA.**

| Term            | ES      | NES     | NP | FDR    | FWER  |
|-----------------|---------|---------|----|--------|-------|
| KEGG_CELL_CYCLE | -0.6771 | -2.1334 | 0  | 0.0216 | 0.011 |

|                                                           |         |         |        |        |       |
|-----------------------------------------------------------|---------|---------|--------|--------|-------|
| KEGG_DNA_REPLICATION                                      | -0.8265 | -2.0059 | 0      | 0.0423 | 0.044 |
| KEGG_MISMATCH_REPAIR                                      | -0.7644 | -1.8842 | 0.0022 | 0.133  | 0.157 |
| KEGG_PROTEASOME                                           | -0.7015 | -1.7962 | 0.0129 | 0.2401 | 0.307 |
| KEGG_HOMOLOGOUS_RECOMBINATION                             | -0.6789 | -1.7852 | 0.0106 | 0.2107 | 0.326 |
| KEGG_OOCYTE_MEIOSIS                                       | -0.4927 | -1.7708 | 0.0145 | 0.1997 | 0.355 |
| KEGG_SPLICEOSOME                                          | -0.5873 | -1.7658 | 0.029  | 0.1772 | 0.368 |
| KEGG_BASAL_TRANSCRIPTION_FACTORS                          | -0.5794 | -1.7461 | 0.0143 | 0.1866 | 0.407 |
| KEGG_PENTOSE_PHOSPHATE_PATHWAY                            | -0.5792 | -1.7444 | 0.0146 | 0.1679 | 0.41  |
| KEGG_NUCLEOTIDE_EXCISION_REPAIR                           | -0.5748 | -1.7173 | 0.023  | 0.1881 | 0.467 |
| KEGG_PROGESTERONE_MEDIATED_OOCYTE_MATURATION              | -0.4706 | -1.6905 | 0.0123 | 0.2132 | 0.539 |
| KEGG_CYSTEINE_AND_METHIONINE_METABOLISM                   | -0.5071 | -1.6039 | 0.0178 | 0.3519 | 0.703 |
| KEGG_N_GLYCAN_BIOSYNTHESIS                                | -0.4799 | -1.5662 | 0.0615 | 0.4049 | 0.762 |
| KEGG_PYRIMIDINE_METABOLISM                                | -0.4252 | -1.5085 | 0.0801 | 0.5189 | 0.835 |
| KEGG_ALZHEIMERS_DISEASE                                   | -0.4249 | -1.5049 | 0.085  | 0.4933 | 0.84  |
| KEGG_P53_SIGNALING_PATHWAY                                | -0.408  | -1.5038 | 0.0568 | 0.4656 | 0.843 |
| KEGG_ONE_CARBON_POOL_BY_FOLATE                            | -0.5457 | -1.4747 | 0.0812 | 0.5077 | 0.868 |
| KEGG_AMYOTROPHIC_LATERAL_SCLEROSIS_ALS                    | -0.3977 | -1.4725 | 0.0566 | 0.4844 | 0.868 |
| KEGG_BASE_EXCISION_REPAIR                                 | -0.523  | -1.4629 | 0.1186 | 0.4825 | 0.879 |
| KEGG_GLYOXYLATE_AND_DICARBOXYLATE_METABOLISM              | -0.5453 | -1.4607 | 0.0925 | 0.4632 | 0.881 |
| KEGG_PURINE_METABOLISM                                    | -0.358  | -1.4584 | 0.0701 | 0.4456 | 0.882 |
| KEGG_VIBRIO_CHOLERAЕ_INFECTION                            | -0.4093 | -1.4517 | 0.0673 | 0.4397 | 0.886 |
| KEGG_GLYCOSYLPHOSPHATIDYLINOSITOL_GPI_ANCHOR_BIOSYNTHESIS | -0.4868 | -1.4232 | 0.1266 | 0.4887 | 0.911 |
| KEGG_PARKINSONS_DISEASE                                   | -0.4858 | -1.4124 | 0.1785 | 0.4908 | 0.919 |
| KEGG_HUNTINGTONS_DISEASE                                  | -0.4052 | -1.4072 | 0.1478 | 0.4853 | 0.923 |
| KEGG_AMINOACYL_TRNA_BIOSYNTHESIS                          | -0.5123 | -1.404  | 0.163  | 0.4734 | 0.927 |
| KEGG_FOLATE_BIOSYNTHESIS                                  | -0.5611 | -1.3906 | 0.139  | 0.4854 | 0.941 |
| KEGG_RNA_DEGRADATION                                      | -0.4542 | -1.3864 | 0.1747 | 0.4772 | 0.944 |
| KEGG_CITRATE_CYCLE_TCA_CYCLE                              | -0.5233 | -1.3798 | 0.1429 | 0.4756 | 0.948 |
| KEGG_GLYCOSPHINGOLIPID_BIOSYNTHESIS_GLOBO_SERIES          | -0.4926 | -1.3725 | 0.1148 | 0.4747 | 0.951 |
| KEGG_RIBOFLAVIN_METABOLISM                                | -0.4519 | -1.3538 | 0.1537 | 0.4956 | 0.957 |
| KEGG_GAP_JUNCTION                                         | -0.3671 | -1.348  | 0.1201 | 0.4917 | 0.96  |
| KEGG_CARDIAC_MUSCLE_CONTRACTION                           | -0.3768 | -1.3393 | 0.1245 | 0.4945 | 0.965 |
| KEGG_UBIQUITIN_MEDIATED_PROTEOLYSIS                       | -0.3781 | -1.3314 | 0.1898 | 0.4963 | 0.969 |
| KEGG_GLYCOSAMINOGLYCAN_BIOSYNTHESIS_HEPARAN_SULFATE       | -0.42   | -1.3248 | 0.1515 | 0.4949 | 0.971 |
| KEGG_LYSINE_DEGRADATION                                   | -0.3998 | -1.3028 | 0.1726 | 0.5282 | 0.98  |
| KEGG_OXIDATIVE_PHOSPHORYLATION                            | -0.4525 | -1.302  | 0.2645 | 0.5155 | 0.981 |
| KEGG_NON_HOMOLOGOUS_END_JOINING                           | -0.5151 | -1.2901 | 0.1947 | 0.5251 | 0.987 |
| KEGG_GLUTATHIONE_METABOLISM                               | -0.3952 | -1.2878 | 0.1804 | 0.516  | 0.987 |
| KEGG_PATHOGENIC_ESCHERICHIA_COLI_INFECTION                | -0.3853 | -1.2846 | 0.2008 | 0.5094 | 0.988 |
| KEGG_DORSO_VENTRAL_AXIS_FORMATION                         | -0.4217 | -1.2824 | 0.1703 | 0.5009 | 0.988 |

|                                                                 |         |         |        |        |       |
|-----------------------------------------------------------------|---------|---------|--------|--------|-------|
| KEGG_GALACTOSE_METABOLISM                                       | -0.4034 | -1.2819 | 0.1623 | 0.4898 | 0.988 |
| KEGG_RNA_POLYMERASE                                             | -0.4328 | -1.2722 | 0.2114 | 0.4965 | 0.991 |
| KEGG_REGULATION_OF_AUTOPHAGY                                    | -0.3774 | -1.2508 | 0.1677 | 0.5259 | 0.993 |
| KEGG_SMALL_CELL_LUNG_CANCER                                     | -0.3516 | -1.2463 | 0.2037 | 0.5225 | 0.993 |
| KEGG_EPITHELIAL_CELL_SIGNALING_IN_HELICOBACTER_PYLORI_INFECTION | -0.3426 | -1.2441 | 0.1967 | 0.5154 | 0.993 |
| KEGG_PANCREATIC_CANCER                                          | -0.3443 | -1.2092 | 0.2474 | 0.5715 | 0.994 |
| KEGG_BLADDER_CANCER                                             | -0.3386 | -1.1937 | 0.2417 | 0.5921 | 0.995 |
| KEGG_PATHWAYS_IN_CANCER                                         | -0.2878 | -1.1929 | 0.2276 | 0.5817 | 0.995 |
| KEGG_GLYCOLYSIS_GLUONEOGENESIS                                  | -0.3417 | -1.1923 | 0.2464 | 0.5711 | 0.995 |
| KEGG_RENAL_CELL_CARCINOMA                                       | -0.3367 | -1.1905 | 0.2567 | 0.5635 | 0.996 |
| KEGG_BIOSYNTHESIS_OF_UNSATURATED_FATTY_ACIDS                    | -0.3948 | -1.1705 | 0.2868 | 0.5919 | 0.997 |
| KEGG_GLYCINE_SERINE_AND_THREONINE_METABOLISM                    | -0.3728 | -1.163  | 0.2524 | 0.5954 | 0.997 |
| KEGG_ENDOCYTOSIS                                                | -0.2955 | -1.1547 | 0.278  | 0.6017 | 0.998 |
| KEGG_ALANINE_ASPARTATE_AND_GLUTAMATE_METABOLISM                 | -0.3427 | -1.1449 | 0.2791 | 0.6095 | 0.998 |
| KEGG_PHENYLALANINE_METABOLISM                                   | -0.3958 | -1.1308 | 0.3159 | 0.6254 | 0.998 |
| KEGG_NOTCH_SIGNALING_PATHWAY                                    | -0.3443 | -1.1268 | 0.3366 | 0.6225 | 0.998 |
| KEGG_SULFUR_METABOLISM                                          | -0.4295 | -1.1255 | 0.3145 | 0.6142 | 0.998 |
| KEGG_PROTEIN_EXPORT                                             | -0.4101 | -1.1169 | 0.3497 | 0.6213 | 0.998 |
| KEGG_FC_GAMMA_R_MEDIATED_PHAGOCYTOSIS                           | -0.3061 | -1.1144 | 0.334  | 0.6158 | 0.998 |
| KEGG_NEUROACTIVE_LIGAND_RECEPTOR_INTERACTION                    | -0.2605 | -1.1127 | 0.264  | 0.6091 | 0.998 |
| KEGG_PRION_DISEASES                                             | -0.3407 | -1.0983 | 0.334  | 0.6257 | 0.998 |
| KEGG_PANTOTHENATE_AND_COA_BIOSYNTHESIS                          | -0.3611 | -1.0917 | 0.3434 | 0.6288 | 0.998 |
| KEGG_PROSTATE_CANCER                                            | -0.2984 | -1.0912 | 0.3307 | 0.62   | 0.998 |
| KEGG_GLIOMA                                                     | -0.3002 | -1.0894 | 0.342  | 0.6137 | 0.998 |
| KEGG_NON_SMALL_CELL_LUNG_CANCER                                 | -0.3171 | -1.087  | 0.3691 | 0.6087 | 0.998 |
| KEGG_PYRUVATE_METABOLISM                                        | -0.3346 | -1.0653 | 0.3765 | 0.6411 | 0.999 |
| KEGG_REGULATION_OF_ACTIN_CYTOSKELETON                           | -0.268  | -1.0502 | 0.3596 | 0.6599 | 0.999 |
| KEGG_MELANOMA                                                   | -0.282  | -1.0492 | 0.3931 | 0.6523 | 0.999 |
| KEGG_SELENOAMINO_ACID_METABOLISM                                | -0.3353 | -1.043  | 0.4114 | 0.6545 | 0.999 |
| KEGG_VALINE_LEUCINE_AND_ISOLEUCINE_BIOSYNTHESIS                 | -0.4442 | -1.0419 | 0.4346 | 0.6475 | 0.999 |
| KEGG_PRIMARY_IMMUNODEFICIENCY                                   | -0.3881 | -1.027  | 0.4433 | 0.6657 | 1     |
| KEGG_LONG_TERM_DEPRESSION                                       | -0.2573 | -1.0243 | 0.4129 | 0.6615 | 1     |
| KEGG_ADIPOCYTOKINE_SIGNALING_PATHWAY                            | -0.2759 | -1.0088 | 0.4571 | 0.6827 | 1     |
| KEGG_TIGHT_JUNCTION                                             | -0.252  | -0.9831 | 0.4513 | 0.723  | 1     |
| KEGG_OTHER_GLYCAN_DEGRADATION                                   | -0.3713 | -0.9818 | 0.4672 | 0.7164 | 1     |
| KEGG_CHEMOKINE_SIGNALING_PATHWAY                                | -0.2571 | -0.9736 | 0.4825 | 0.7239 | 1     |
| KEGG_CHRONIC_MYELOID_LEUKEMIA                                   | -0.28   | -0.971  | 0.4909 | 0.7203 | 1     |
| KEGG_MELANOGENESIS                                              | -0.2419 | -0.9634 | 0.5209 | 0.7254 | 1     |
| KEGG_FRUCTOSE_AND_MANNOSE_METABOLISM                            | -0.2867 | -0.9609 | 0.5    | 0.721  | 1     |
| KEGG_ACUTE_MYELOID_LEUKEMIA                                     | -0.2673 | -0.9347 | 0.5184 | 0.7621 | 1     |
| KEGG_GLYCOSPHINGOLIPID_BIOSYNTHESIS_LACTO_AND_                  | -0.2778 | -0.9051 | 0.5678 | 0.8099 | 1     |

|                                                         |         |         |        |        |   |
|---------------------------------------------------------|---------|---------|--------|--------|---|
| NEOLACTO_SERIES                                         |         |         |        |        |   |
| KEGG_INOSITOL_PHOSPHATE_METABOLISM                      | -0.2616 | -0.8983 | 0.5513 | 0.8142 | 1 |
| KEGG_GLYCEROLIPID_METABOLISM                            | -0.2404 | -0.8963 | 0.6052 | 0.8079 | 1 |
| KEGG_ARGININE_AND_PROLINE_METABOLISM                    | -0.2555 | -0.8951 | 0.5922 | 0.8012 | 1 |
| KEGG_ADHERENS_JUNCTION                                  | -0.2594 | -0.893  | 0.5638 | 0.7966 | 1 |
| KEGG_CALCIIUM_SIGNALING_PATHWAY                         | -0.2071 | -0.8768 | 0.6762 | 0.8183 | 1 |
| KEGG_AMINO_SUGAR_AND_NUCLEOTIDE_SUGAR_METABOLISM        | -0.2632 | -0.875  | 0.5876 | 0.8126 | 1 |
| KEGG_NOD LIKE RECEPTOR SIGNALING PATHWAY                | -0.2538 | -0.8711 | 0.5963 | 0.8116 | 1 |
| KEGG_CYTOSOLIC_DNA_SENSING_PATHWAY                      | -0.2393 | -0.8702 | 0.6159 | 0.804  | 1 |
| KEGG_GLYCOSAMINOGLYCAN_BIOSYNTHESIS_KERATAN_SULFATE     | -0.3146 | -0.8698 | 0.6182 | 0.7962 | 1 |
| KEGG_TOLL LIKE RECEPTOR SIGNALING PATHWAY               | -0.2352 | -0.8613 | 0.5864 | 0.8043 | 1 |
| KEGG_TERPENOID_BACKBONE_BIOSYNTHESIS                    | -0.3353 | -0.8586 | 0.6067 | 0.8012 | 1 |
| KEGG_DRUG_METABOLISM_OTHER_ENZYMES                      | -0.2437 | -0.8469 | 0.7    | 0.8147 | 1 |
| KEGG_COLORECTAL_CANCER                                  | -0.2368 | -0.8298 | 0.6513 | 0.8395 | 1 |
| KEGG_LEUKOCYTE_TRANSENDOTHELIAL_MIGRATION               | -0.2209 | -0.811  | 0.6918 | 0.8665 | 1 |
| KEGG_NICOTINATE_AND_NICOTINAMIDE_METABOLISM             | -0.2462 | -0.8086 | 0.7303 | 0.862  | 1 |
| KEGG_MAPK_SIGNALING_PATHWAY                             | -0.1882 | -0.8074 | 0.7465 | 0.8555 | 1 |
| KEGG_LYSOSOME                                           | -0.2355 | -0.8071 | 0.6446 | 0.8474 | 1 |
| KEGG_INSULIN_SIGNALING_PATHWAY                          | -0.1981 | -0.7941 | 0.7631 | 0.8613 | 1 |
| KEGG_SPHINGOLIPID_METABOLISM                            | -0.2332 | -0.7827 | 0.7174 | 0.8728 | 1 |
| KEGG_GLYCOSAMINOGLYCAN_BIOSYNTHESIS_CHONDROITIN_SULFATE | -0.2637 | -0.766  | 0.7423 | 0.8931 | 1 |
| KEGG_B_CELL_RECEPTOR_SIGNALING_PATHWAY                  | -0.2254 | -0.7609 | 0.714  | 0.8931 | 1 |
| KEGG_NEUROTROPHIN_SIGNALING_PATHWAY                     | -0.2026 | -0.7518 | 0.7646 | 0.8998 | 1 |
| KEGG_WNT_SIGNALING_PATHWAY                              | -0.1878 | -0.74   | 0.8306 | 0.9108 | 1 |
| KEGG_PHOSPHATIDYLINOSITOL_SIGNALING_SYSTEM              | -0.2061 | -0.7357 | 0.7813 | 0.9087 | 1 |
| KEGG_THYROID_CANCER                                     | -0.2379 | -0.7335 | 0.7946 | 0.9046 | 1 |
| KEGG_T_CELL_RECEPTOR_SIGNALING_PATHWAY                  | -0.2095 | -0.7332 | 0.7369 | 0.8967 | 1 |
| KEGG_ERBB_SIGNALING_PATHWAY                             | -0.1858 | -0.6984 | 0.8436 | 0.9409 | 1 |
| KEGG_PORPHYRIN_AND_CHLOROPHYLL_METABOLISM               | -0.2124 | -0.6955 | 0.8706 | 0.9363 | 1 |
| KEGG_OLFACTORY_TRANSDUCTION                             | -0.2266 | -0.6904 | 0.8665 | 0.9349 | 1 |
| KEGG_RIG I LIKE RECEPTOR SIGNALING PATHWAY              | -0.183  | -0.6778 | 0.8994 | 0.9441 | 1 |
| KEGG_TGF_BETA_SIGNALING_PATHWAY                         | -0.1853 | -0.6752 | 0.8928 | 0.9388 | 1 |
| KEGG_SYSTEMIC_LUPUS_ERYTHEMATOSUS                       | -0.204  | -0.6742 | 0.7725 | 0.932  | 1 |
| KEGG_LONG_TERM_POTENTIATION                             | -0.1787 | -0.6709 | 0.9234 | 0.9278 | 1 |
| KEGG_ANTIGEN_PROCESSING_AND_PRESENTATION                | -0.2047 | -0.6687 | 0.8182 | 0.9227 | 1 |
| KEGG_AXON_GUIDANCE                                      | -0.1713 | -0.6655 | 0.9245 | 0.9186 | 1 |
| KEGG_NATURAL_KILLER_CELL_MEDIATED_CYTOTOXICITY          | -0.1784 | -0.6649 | 0.872  | 0.9116 | 1 |
| KEGG_ENDOMETRIAL_CANCER                                 | -0.194  | -0.6583 | 0.877  | 0.9114 | 1 |
| KEGG_STARCH_AND_SUCROSE_METABOLISM                      | -0.1883 | -0.6494 | 0.958  | 0.9141 | 1 |
| KEGG_VIRAL_MYOCARDITIS                                  | -0.1957 | -0.6344 | 0.8407 | 0.9237 | 1 |

|                                                           |         |         |        |        |   |
|-----------------------------------------------------------|---------|---------|--------|--------|---|
| KEGG_PENTOSE_AND_GLUCURONATE_INTERCONVERSIONS             | -0.2211 | -0.6336 | 0.9165 | 0.917  | 1 |
| KEGG_STEROID_HORMONE_BIOSYNTHESIS                         | -0.2047 | -0.6282 | 0.9715 | 0.9146 | 1 |
| KEGG_STEROID_BIOSYNTHESIS                                 | -0.2421 | -0.6184 | 0.8651 | 0.9164 | 1 |
| KEGG_FOCAL_ADHESION                                       | -0.1339 | -0.4713 | 0.9979 | 0.9908 | 1 |
| KEGG_RETINOL_METABOLISM                                   | -0.1354 | -0.45   | 1      | 0.9874 | 1 |
| KEGG_METABOLISM_OF_XENOBIOTICS_BY_CYTOCHROME_P450         | 0.1482  | 0.4796  | 0.9961 | 0.9805 | 1 |
| KEGG_MATURITY_ONSET_DIABETES_OF_THE_YOUNG                 | 0.177   | 0.5051  | 0.9921 | 0.9878 | 1 |
| KEGG_MTOR_SIGNALING_PATHWAY                               | 0.1457  | 0.5196  | 0.9941 | 0.9989 | 1 |
| KEGG_TASTE_TRANSDUCTION                                   | 0.1715  | 0.5281  | 0.9627 | 1      | 1 |
| KEGG_LEISHMANIA_INFECTION                                 | 0.1828  | 0.5505  | 0.8887 | 1      | 1 |
| KEGG_ECM_RECEPTOR_INTERACTION                             | 0.174   | 0.5527  | 0.9348 | 1      | 1 |
| KEGG_CYTOKINE_CYTOKINE_RECEPTOR_INTERACTION               | 0.1514  | 0.5802  | 0.9466 | 1      | 1 |
| KEGG_BASAL_CELL_CARCINOMA                                 | 0.1753  | 0.618   | 0.952  | 1      | 1 |
| KEGG_TYPE_I_DIABETES_MELLITUS                             | 0.2361  | 0.6355  | 0.8069 | 1      | 1 |
| KEGG_DRUG_METABOLISM_CYTOCHROME_P450                      | 0.1945  | 0.6408  | 0.9453 | 1      | 1 |
| KEGG_ASCORBATE_AND_ALDARATE_METABOLISM                    | 0.2404  | 0.6509  | 0.9022 | 1      | 1 |
| KEGG_JAK_STAT_SIGNALING_PATHWAY                           | 0.1779  | 0.6842  | 0.8842 | 1      | 1 |
| KEGG_DILATED_CARDIOMYOPATHY                               | 0.1889  | 0.6897  | 0.8974 | 1      | 1 |
| KEGG_TAURINE_AND_HYPOTAURINE_METABOLISM                   | 0.2816  | 0.7275  | 0.8396 | 0.9907 | 1 |
| KEGG_GNRH_SIGNALING_PATHWAY                               | 0.1819  | 0.729   | 0.8784 | 1      | 1 |
| KEGG_CELL_ADHESION_MOLECULES_CAMS                         | 0.2082  | 0.7299  | 0.7296 | 1      | 1 |
| KEGG_HYPERTROPHIC_CARDIOMYOPATHY_HCM                      | 0.2036  | 0.7473  | 0.8242 | 1      | 1 |
| KEGG_TRYPTOPHAN_METABOLISM                                | 0.224   | 0.7475  | 0.8087 | 1      | 1 |
| KEGG_HEDGEHOG_SIGNALING_PATHWAY                           | 0.2074  | 0.7567  | 0.8058 | 1      | 1 |
| KEGG_COMPLEMENT_AND_COAGULATION_CASCADES                  | 0.2324  | 0.7659  | 0.7365 | 1      | 1 |
| KEGG_VEGF_SIGNALING_PATHWAY                               | 0.1962  | 0.7684  | 0.8116 | 1      | 1 |
| KEGG_GLYCOSAMINOGLYCAN_DEGRADATION                        | 0.2671  | 0.7721  | 0.72   | 1      | 1 |
| KEGG_TYROSINE_METABOLISM                                  | 0.2251  | 0.7784  | 0.8157 | 1      | 1 |
| KEGG_GRAFT_VERSUS_HOST_DISEASE                            | 0.3202  | 0.7802  | 0.6699 | 1      | 1 |
| KEGG_ARRHYTHMOGENIC_RIGHT_VENTRICULAR_CARDIOMYOPATHY_ARVC | 0.2201  | 0.7804  | 0.757  | 1      | 1 |
| KEGG_BETA_ALANINE_METABOLISM                              | 0.2494  | 0.7893  | 0.7568 | 1      | 1 |
| KEGG_SNARE_INTERACTIONS_IN_VESICULAR_TRANSPORT            | 0.2413  | 0.7994  | 0.7126 | 1      | 1 |
| KEGG_GLYCEROPHOSPHOLIPID_METABOLISM                       | 0.2085  | 0.8157  | 0.7405 | 1      | 1 |
| KEGG_RENIN_ANGIOTENSIN_SYSTEM                             | 0.2982  | 0.8504  | 0.6772 | 1      | 1 |
| KEGG_VASOPRESSIN_REGULATED_WATER_REABSORPTION             | 0.2624  | 0.8613  | 0.656  | 1      | 1 |
| KEGG_TYPE_II_DIABETES_MELLITUS                            | 0.2476  | 0.8791  | 0.6494 | 1      | 1 |
| KEGG_ABC_TRANSPORTERS                                     | 0.2563  | 0.91    | 0.5758 | 1      | 1 |
| KEGG_APOPTOSIS                                            | 0.2598  | 0.9372  | 0.5262 | 1      | 1 |
| KEGG_VASCULAR_SMOOTH_MUSCLE_CONTRACTION                   | 0.2402  | 0.9457  | 0.5287 | 1      | 1 |
| KEGG_ETHER_LIPID_METABOLISM                               | 0.2791  | 0.968   | 0.5073 | 1      | 1 |



|                                                   |         |         |        |        |       |
|---------------------------------------------------|---------|---------|--------|--------|-------|
| KEGG_AUTOIMMUNE_THYROID_DISEASE                   | 0.3437  | 0.9705  | 0.4795 | 1      | 1     |
| KEGG_HEMATOPOIETIC_CELL_LINEAGE                   | 0.3122  | 0.9972  | 0.4482 | 1      | 1     |
| KEGG_PPAR_SIGNALING_PATHWAY                       | 0.2695  | 1.0095  | 0.4185 | 1      | 1     |
| KEGG_INTESTINAL_IMMUNE_NETWORK_FOR_IGA_PRODUCTION | 0.3806  | 1.0115  | 0.4691 | 1      | 1     |
| KEGG_FC_EPSILON_RI_SIGNALING_PATHWAY              | 0.2769  | 1.035   | 0.4274 | 1      | 1     |
| KEGG_ALLOGRAFT_REJECTION                          | 0.4411  | 1.065   | 0.4453 | 1      | 1     |
| KEGG_VALINE_LEUCINE_AND_ISOLEUCINE_DEGRADATION    | 0.3551  | 1.0659  | 0.3938 | 1      | 1     |
| KEGG_BUTANOATE_METABOLISM                         | 0.3394  | 1.0736  | 0.3775 | 1      | 1     |
| KEGG_RIBOSOME                                     | 0.5229  | 1.0938  | 0.4415 | 1      | 0.998 |
| KEGG_CIRCADIAN_RHYTHM_MAMMAL                      | 0.4284  | 1.126   | 0.326  | 1      | 0.998 |
| KEGG_PROPANOATE_METABOLISM                        | 0.383   | 1.1366  | 0.3306 | 1      | 0.998 |
| KEGG_PROXIMAL_TUBULE_BICARBONATE_RECLAMATION      | 0.3631  | 1.1458  | 0.2886 | 1      | 0.998 |
| KEGG_HISTIDINE_METABOLISM                         | 0.3683  | 1.1857  | 0.2598 | 1      | 0.994 |
| KEGG_PRIMARY_BILE_ACID_BIOSYNTHESIS               | 0.424   | 1.1866  | 0.2358 | 1      | 0.994 |
| KEGG_PEROXISOME                                   | 0.34    | 1.1881  | 0.2649 | 1      | 0.994 |
| KEGG_LIMONENE_AND_PINENE_DEGRADATION              | 0.4976  | 1.1981  | 0.2651 | 1      | 0.994 |
| KEGG_O_GLYCAN_BIOSYNTHESIS                        | 0.4079  | 1.2585  | 0.1976 | 1      | 0.989 |
| KEGG_FATTY_ACID_METABOLISM                        | 0.3952  | 1.2616  | 0.1996 | 1      | 0.988 |
| KEGG_LINOLEIC_ACID_METABOLISM                     | 0.4127  | 1.2632  | 0.1562 | 1      | 0.988 |
| KEGG_NITROGEN_METABOLISM                          | 0.4024  | 1.3163  | 0.1139 | 1      | 0.984 |
| KEGG_ALDOSTERONE_REGULATED_SODIUM_REABSORPTION    | 0.3813  | 1.3476  | 0.1161 | 1      | 0.971 |
| KEGG_ALPHA_LINOLENIC_ACID_METABOLISM              | 0.4997  | 1.5166  | 0.0572 | 0.8195 | 0.814 |
| KEGG_ASTMHA                                       | 0.6228  | 1.5631  | 0.1086 | 0.816  | 0.732 |
| KEGG_GLYCOSPHINGOLIPID_BIOSYNTHESIS_GANGLIOSERIES | 0.563   | 1.5649  | 0.0364 | 1      | 0.73  |
| KEGG_ARACHIDONIC_ACID_METABOLISM                  | 0.4391  | 1.6054  | 0.0101 | 1      | 0.669 |
| HALLMARK_SPERMATOGENESIS                          | -0.5399 | -2.0916 | 0      | 0.0272 | 0.019 |
| HALLMARK_E2F_TARGETS                              | -0.7373 | -1.9891 | 0      | 0.0299 | 0.041 |
| HALLMARK_G2M_CHECKPOINT                           | -0.7079 | -1.9615 | 0      | 0.0249 | 0.053 |
| HALLMARK_MTORC1_SIGNALING                         | -0.5803 | -1.9552 | 0.0041 | 0.0199 | 0.054 |
| HALLMARK_MYC_TARGETS_V1                           | -0.6282 | -1.7232 | 0.0481 | 0.0962 | 0.219 |
| HALLMARK_MYC_TARGETS_V2                           | -0.6597 | -1.6994 | 0.0367 | 0.0917 | 0.241 |
| HALLMARK_UNFOLDED_PROTEIN_RESPONSE                | -0.4893 | -1.6614 | 0.037  | 0.1009 | 0.296 |
| HALLMARK_PI3K_AKT_MTOR_SIGNALING                  | -0.4461 | -1.6512 | 0.0381 | 0.0935 | 0.308 |
| HALLMARK_DNA_REPAIR                               | -0.4797 | -1.626  | 0.0644 | 0.0963 | 0.333 |
| HALLMARK_MITOTIC_SPINDLE                          | -0.4903 | -1.607  | 0.0573 | 0.0983 | 0.36  |
| HALLMARK_GLYCOLYSIS                               | -0.403  | -1.5072 | 0.071  | 0.1518 | 0.48  |
| HALLMARK_UV_RESPONSE_UP                           | -0.3432 | -1.3706 | 0.0956 | 0.2548 | 0.646 |
| HALLMARK_OXIDATIVE_PHOSPHORYLATION                | -0.4654 | -1.3681 | 0.2025 | 0.2376 | 0.649 |
| HALLMARK_ESTROGEN_RESPONSE_LATE                   | -0.2987 | -1.2652 | 0.1437 | 0.3292 | 0.753 |
| HALLMARK_HYPOXIA                                  | -0.3037 | -1.194  | 0.2327 | 0.3942 | 0.813 |

|                                            |         |         |        |        |       |
|--------------------------------------------|---------|---------|--------|--------|-------|
| HALLMARK_APICAL_SURFACE                    | -0.3217 | -1.144  | 0.2639 | 0.4378 | 0.855 |
| HALLMARK_CHOLESTEROL_HOMEOSTASIS           | -0.3246 | -1.1229 | 0.3156 | 0.4418 | 0.873 |
| HALLMARK_ANDROGEN_RESPONSE                 | -0.2762 | -1.0189 | 0.4271 | 0.572  | 0.923 |
| HALLMARK_PROTEIN_SECRETION                 | -0.3019 | -0.9947 | 0.4361 | 0.5782 | 0.931 |
| HALLMARK_WNT_BETA_CATENIN_SIGNALING        | -0.3161 | -0.987  | 0.462  | 0.5608 | 0.934 |
| HALLMARK_XENOBIOTIC_METABOLISM             | -0.239  | -0.9794 | 0.4664 | 0.5463 | 0.935 |
| HALLMARK_KRAS_SIGNALING_DN                 | -0.2222 | -0.9605 | 0.539  | 0.5496 | 0.94  |
| HALLMARK_REACTIVE_OXYGEN_SPECIES_PATHWAY   | -0.2863 | -0.8869 | 0.5794 | 0.6412 | 0.959 |
| HALLMARK_COMPLEMENT                        | -0.218  | -0.85   | 0.6327 | 0.6763 | 0.969 |
| HALLMARK_APICAL_JUNCTION                   | -0.2132 | -0.7869 | 0.7235 | 0.7583 | 0.982 |
| HALLMARK_ADIPOGENESIS                      | -0.2037 | -0.7734 | 0.7275 | 0.7541 | 0.985 |
| HALLMARK_APOPTOSIS                         | -0.192  | -0.7624 | 0.7881 | 0.7442 | 0.986 |
| HALLMARK_PANCREAS_BETA_CELLS               | -0.2231 | -0.7208 | 0.8504 | 0.778  | 0.991 |
| HALLMARK_ALLOGRAFT_REJECTION               | -0.152  | -0.4981 | 0.948  | 0.9626 | 0.998 |
| HALLMARK_EPITHELIAL_MESENCHYMAL_TRANSITION | 0.1354  | 0.4112  | 0.9844 | 0.9864 | 0.999 |
| HALLMARK_TNFA_SIGNALING_VIA_NFKB           | 0.1343  | 0.4633  | 0.9882 | 1      | 0.999 |
| HALLMARK_INTERFERON_ALPHA_RESPONSE         | 0.1783  | 0.5004  | 0.878  | 1      | 0.999 |
| HALLMARK_INTERFERON_GAMMA_RESPONSE         | 0.1659  | 0.5144  | 0.9004 | 1      | 0.999 |
| HALLMARK_INFLAMMATORY_RESPONSE             | 0.1556  | 0.5586  | 0.9298 | 1      | 0.998 |
| HALLMARK_ANGIOGENESIS                      | 0.1729  | 0.5623  | 0.9733 | 1      | 0.998 |
| HALLMARK_MYOGENESIS                        | 0.1434  | 0.5694  | 0.9901 | 1      | 0.998 |
| HALLMARK_IL6_JAK_STAT3_SIGNALING           | 0.1825  | 0.5928  | 0.8887 | 1      | 0.997 |
| HALLMARK_NOTCH_SIGNALING                   | 0.1935  | 0.6313  | 0.9273 | 1      | 0.996 |
| HALLMARK_TGF_BETA_SIGNALING                | 0.1961  | 0.6394  | 0.8757 | 1      | 0.996 |
| HALLMARK_KRAS_SIGNALING_UP                 | 0.1728  | 0.7151  | 0.833  | 1      | 0.988 |
| HALLMARK_IL2_STAT5_SIGNALING               | 0.1874  | 0.7691  | 0.748  | 1      | 0.986 |
| HALLMARK_BILE_ACID_METABOLISM              | 0.2227  | 0.9007  | 0.5898 | 1      | 0.97  |
| HALLMARK_ESTROGEN_RESPONSE_EARLY           | 0.2137  | 0.9038  | 0.5734 | 1      | 0.97  |
| HALLMARK_UV_RESPONSE_DN                    | 0.2594  | 0.9377  | 0.5094 | 1      | 0.961 |
| HALLMARK_FATTY_ACID_METABOLISM             | 0.2534  | 0.9418  | 0.504  | 1      | 0.959 |
| HALLMARK_PEROXISOME                        | 0.2509  | 0.966   | 0.4817 | 1      | 0.948 |
| HALLMARK_HEME_METABOLISM                   | 0.2376  | 1.01    | 0.4035 | 1      | 0.934 |
| HALLMARK_COAGULATION                       | 0.2752  | 1.029   | 0.4048 | 1      | 0.926 |
| HALLMARK_HEDGEHOG_SIGNALING                | 0.3205  | 1.0594  | 0.3895 | 1      | 0.914 |
| HALLMARK_P53_PATHWAY                       | 0.3405  | 1.3784  | 0.1004 | 1      | 0.672 |
