# Supplementary figures and images for: RBM10 Is a Biomarker Associated with Pan‐Cancer Prognosis and Immune Infiltration: System Analysis Combined with In Vitro and Vivo Experiments
Source: Hindawi journal article supplement (doi:10.1155/2022/7654937), 2022-01-01

Supplementary original western blots

Figure 8F

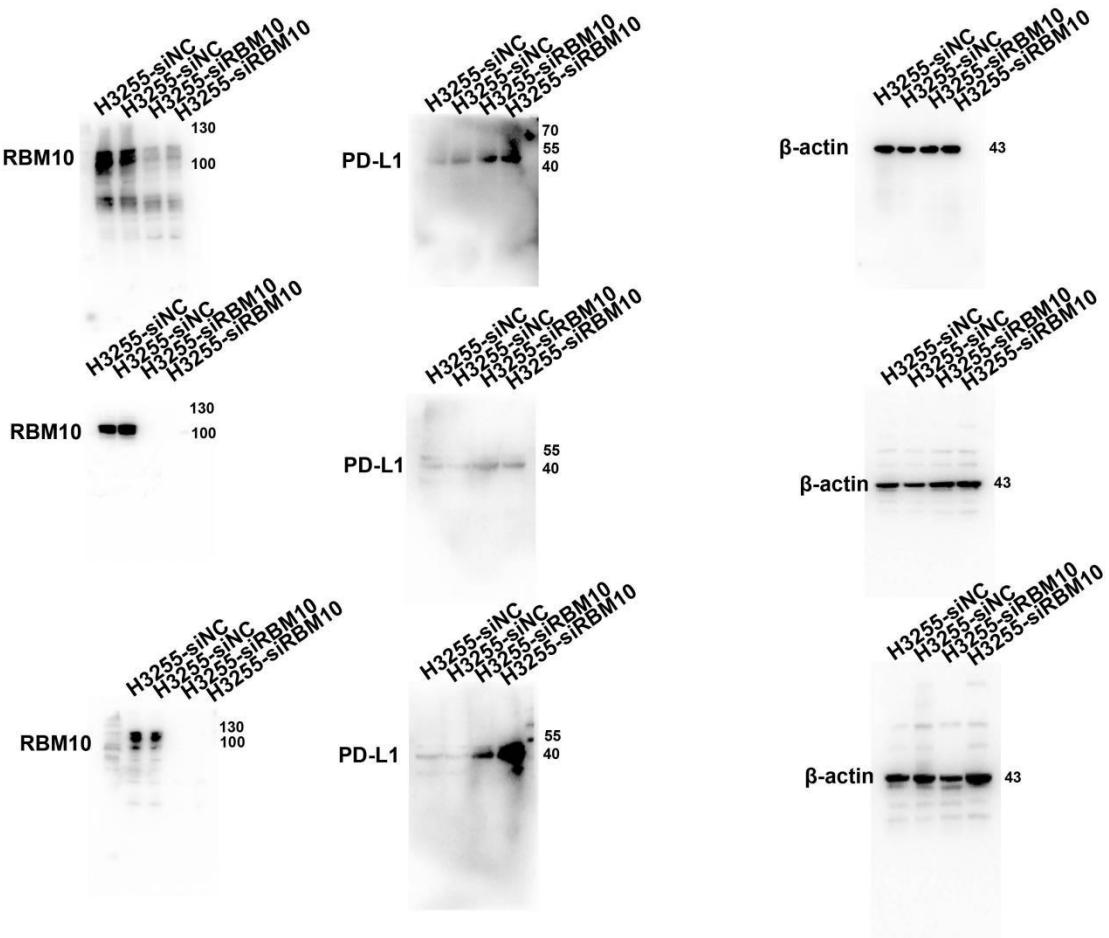

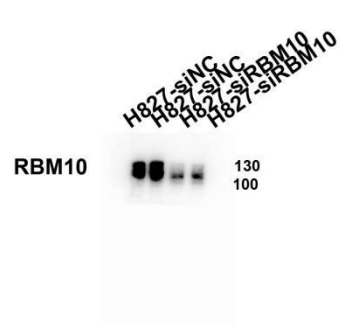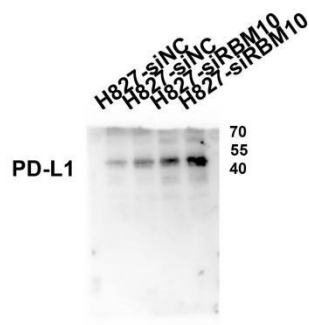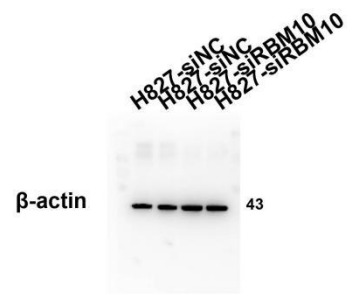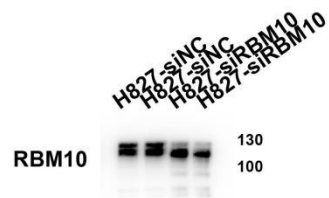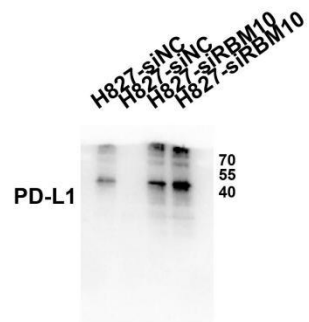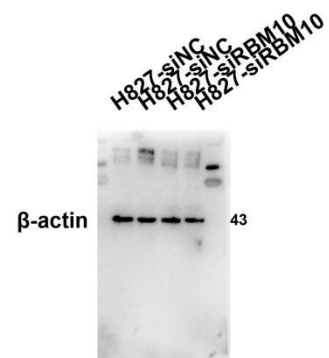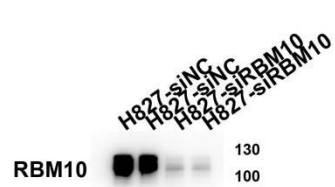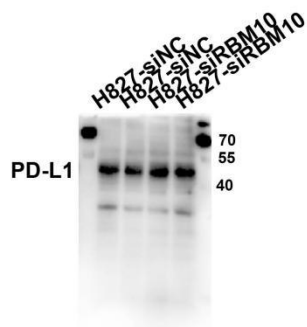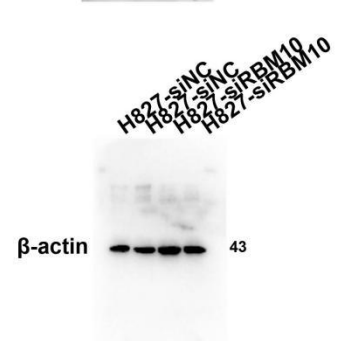

Figure 8G

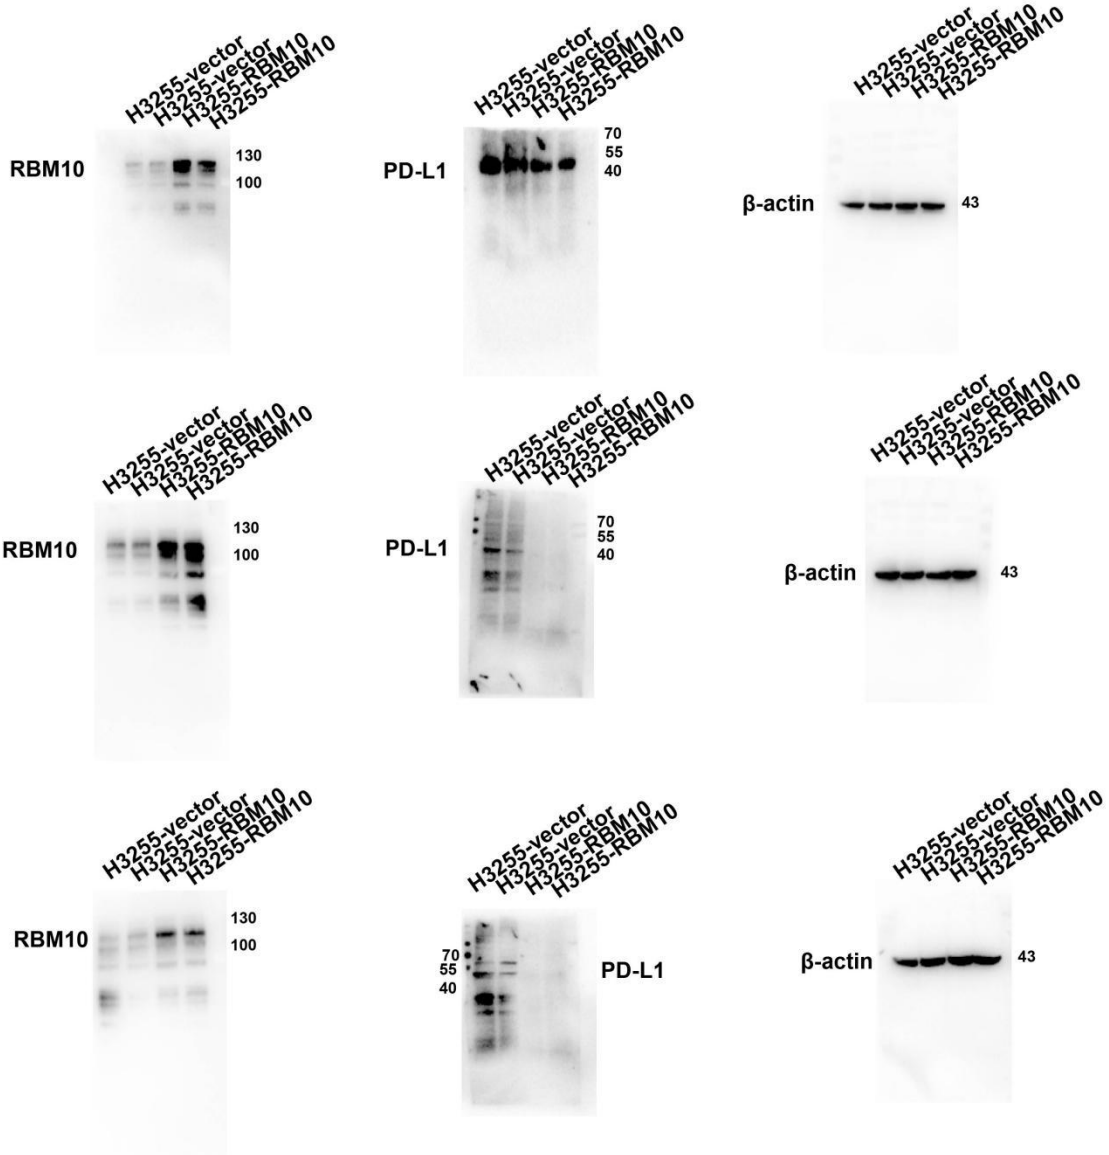

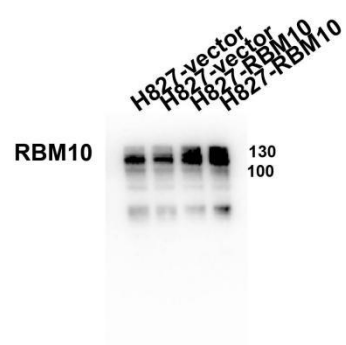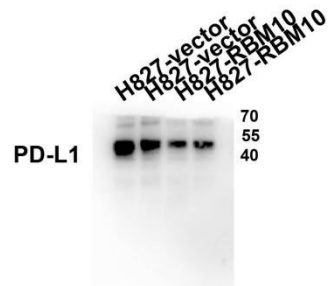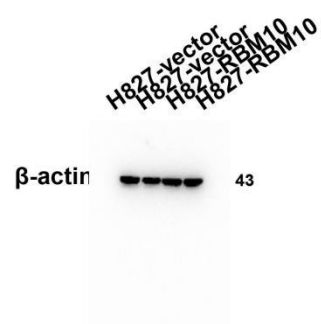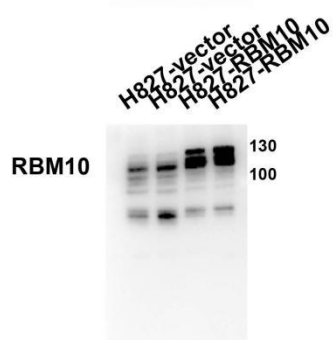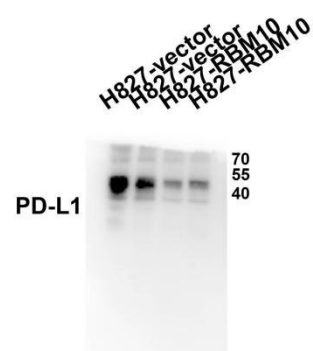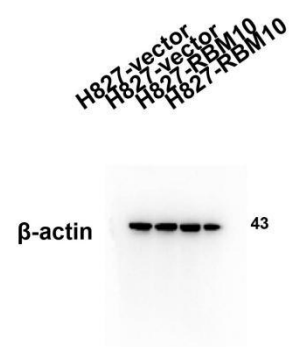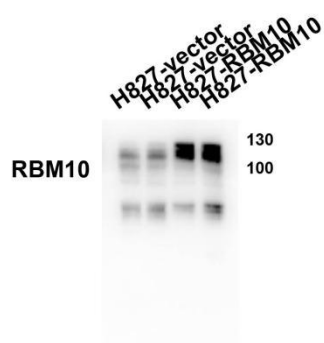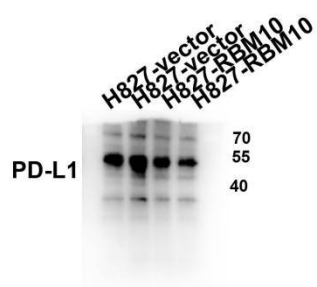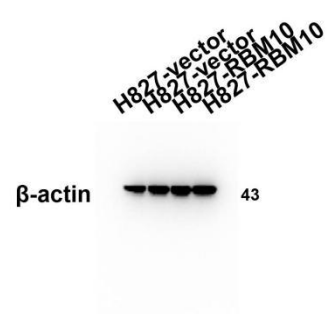

**Figure 8H**

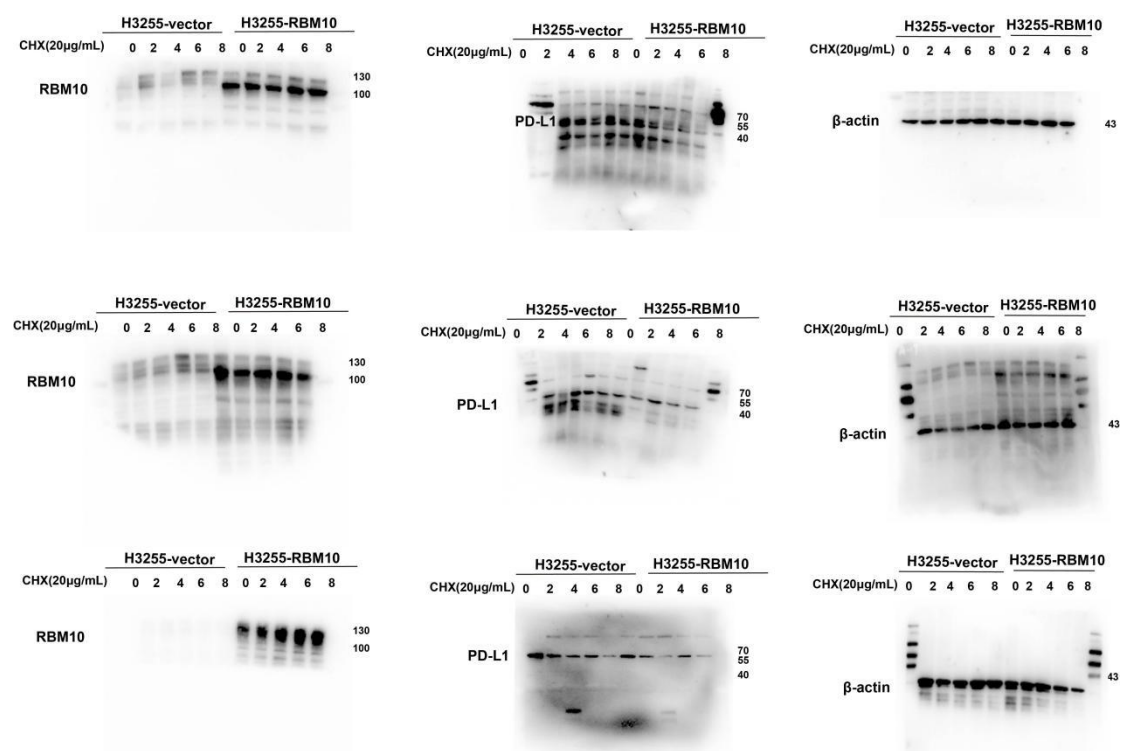

Figure 8I

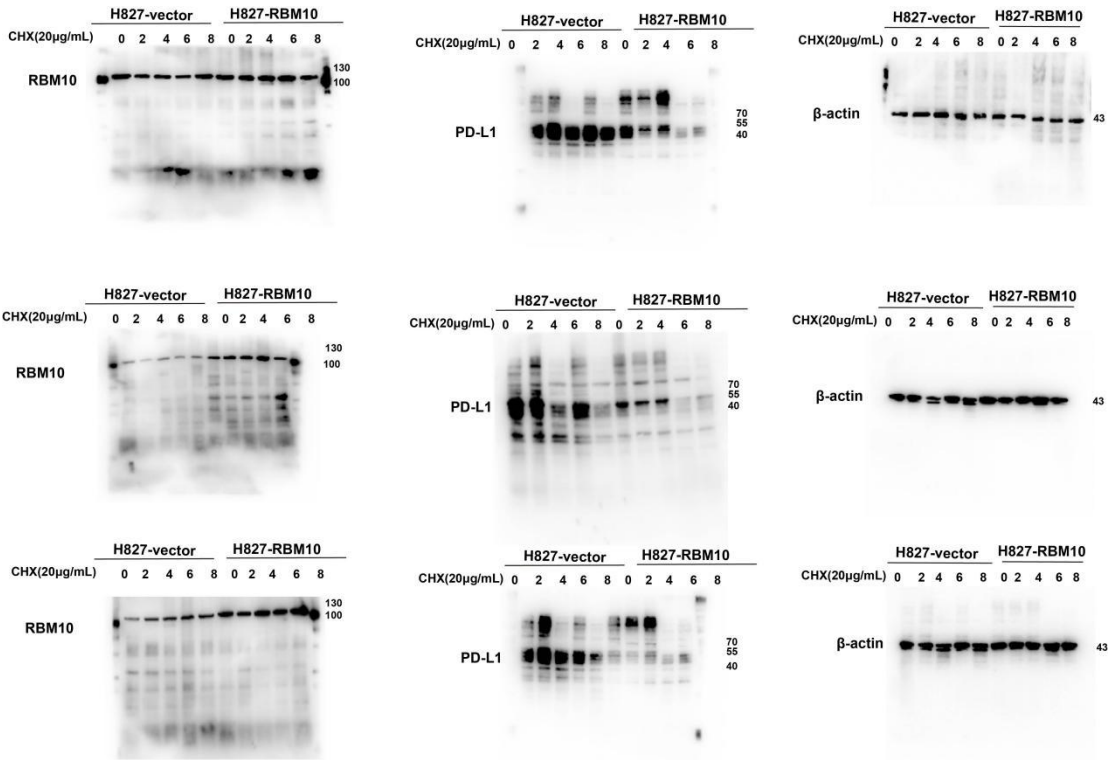

Figure 9E

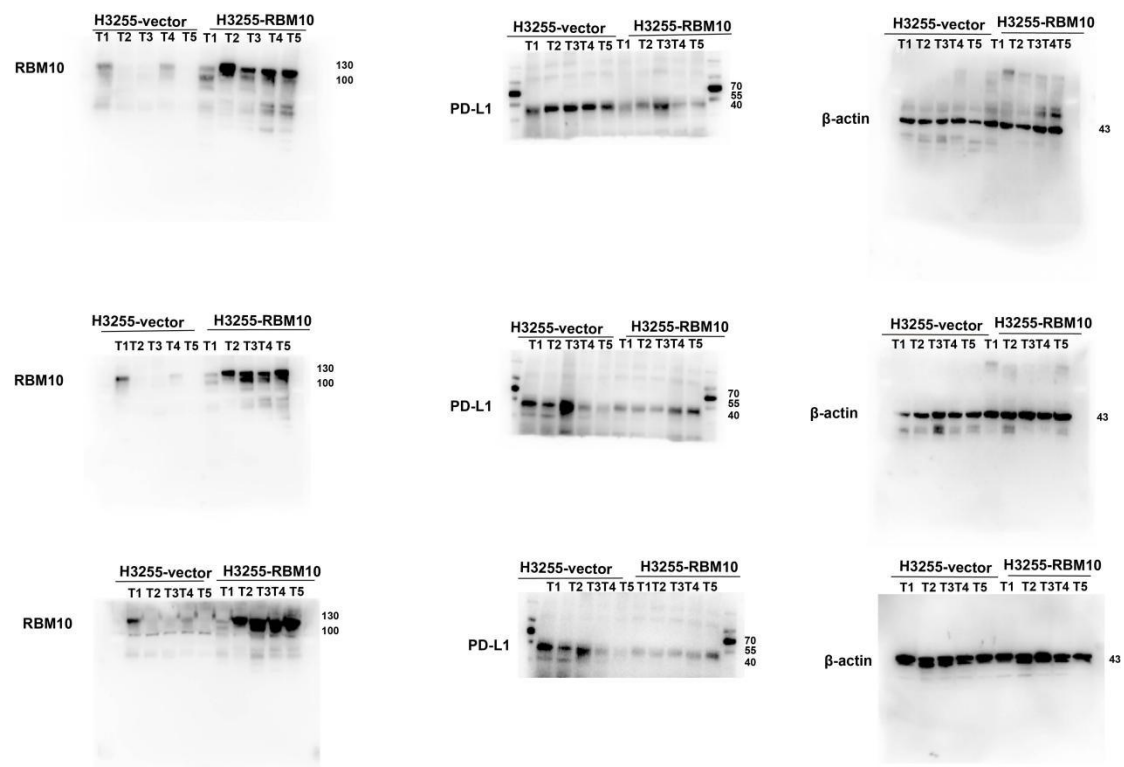

Supplement: f1 [file 7654937.f1.zip]
